# Supplementary material for: The Good, the Bad, and the Ugly: “HiPen”, a New Dataset for Validating (S)QM/MM Free Energy Simulations
Source: Molecules. 2019 Feb 14;24(4):681. doi: 10.3390/molecules24040681 (PMC6413162; doi:10.3390/molecules24040681)
Supplement: Supplementary file 1 [file molecules-24-00681-s001.zip › final-SI/acs-hipen22.bib]

This is an auxiliary file used by the `achemso' bundle.
This file may safely be deleted. It will be recreated as required.
 
@Control{achemso-control,
  ctrl-article-title  = "yes",
  ctrl-chapter-title  = "no",
  ctrl-doi            = "no",
  ctrl-etal-number    = "0",
  ctrl-etal-firstonly = "yes",
}
