# Supplementary material for: The Good, the Bad, and the Ugly: “HiPen”, a New Dataset for Validating (S)QM/MM Free Energy Simulations
Source: Molecules. 2019 Feb 14;24(4):681. doi: 10.3390/molecules24040681 (PMC6413162; doi:10.3390/molecules24040681)
Supplement: Supplementary file 1 [file molecules-24-00681-s001.zip › final-SI/hipen22.aux]

\relax 
\citation{achemso-control}
\providecommand{\mciteSetMaxWidth}[3]{\relax}
\providecommand{\mciteSetMaxCount}[3]{\relax}
\bibstyle{achemso}
\providecommand \oddpage@label [2]{}
\@writefile{lof}{\contentsline {figure}{\numberline {1}{\ignorespaces All 22 molecules included in our HiPen testset.\relax }}{2}}
\@writefile{lof}{\contentsline {figure}{\numberline {2}{\ignorespaces (a) \textbf  {1}'s potential energy ``forward'' ($P_{mm}$) and ``backward'' ($P_{3ob}$) distributions plotted as ``offset'' from the $\overline  {\Delta U^{MM \to 3ob}}$ to simplify the x-axis. (b) \textbf  {1}'s nonequilibrium work ``forward'' ($P_{mm}$) and ``backward'' ($P_{3ob}$) distributions plotted as ``offset'' from the $\overline  {W^{MM \to 3ob}}$ to simplify the x-axis.\relax }}{3}}
\@writefile{lof}{\contentsline {figure}{\numberline {3}{\ignorespaces (a) \textbf  {2}'s potential energy ``forward'' ($P_{mm}$) and ``backward'' ($P_{3ob}$) distributions plotted as ``offset'' from the $\overline  {\Delta U^{MM \to 3ob}}$ to simplify the x-axis. (b) \textbf  {2}'s nonequilibrium work ``forward'' ($P_{mm}$) and ``backward'' ($P_{3ob}$) distributions plotted as ``offset'' from the $\overline  {W^{MM \to 3ob}}$ to simplify the x-axis.\relax }}{3}}
\@writefile{lof}{\contentsline {figure}{\numberline {4}{\ignorespaces (a) \textbf  {3}'s potential energy ``forward'' ($P_{mm}$) and ``backward'' ($P_{3ob}$) distributions plotted as ``offset'' from the $\overline  {\Delta U^{MM \to 3ob}}$ to simplify the x-axis. (b) \textbf  {3}'s nonequilibrium work ``forward'' ($P_{mm}$) and ``backward'' ($P_{3ob}$) distributions plotted as ``offset'' from the $\overline  {W^{MM \to 3ob}}$ to simplify the x-axis.\relax }}{4}}
\@writefile{lof}{\contentsline {figure}{\numberline {5}{\ignorespaces (a) \textbf  {4}'s potential energy ``forward'' ($P_{mm}$) and ``backward'' ($P_{3ob}$) distributions plotted as ``offset'' from the $\overline  {\Delta U^{MM \to 3ob}}$ to simplify the x-axis. (b) \textbf  {4}'s nonequilibrium work ``forward'' ($P_{mm}$) and ``backward'' ($P_{3ob}$) distributions plotted as ``offset'' from the $\overline  {W^{MM \to 3ob}}$ to simplify the x-axis.\relax }}{4}}
\@writefile{lof}{\contentsline {figure}{\numberline {6}{\ignorespaces (a) \textbf  {5}'s potential energy ``forward'' ($P_{mm}$) and ``backward'' ($P_{3ob}$) distributions plotted as ``offset'' from the $\overline  {\Delta U^{MM \to 3ob}}$ to simplify the x-axis. (b) \textbf  {5}'s nonequilibrium work ``forward'' ($P_{mm}$) and ``backward'' ($P_{3ob}$) distributions plotted as ``offset'' from the $\overline  {W^{MM \to 3ob}}$ to simplify the x-axis.\relax }}{5}}
\@writefile{lof}{\contentsline {figure}{\numberline {7}{\ignorespaces (a) \textbf  {6}'s potential energy ``forward'' ($P_{mm}$) and ``backward'' ($P_{3ob}$) distributions plotted as ``offset'' from the $\overline  {\Delta U^{MM \to 3ob}}$ to simplify the x-axis. (b) \textbf  {6}'s nonequilibrium work ``forward'' ($P_{mm}$) and ``backward'' ($P_{3ob}$) distributions plotted as ``offset'' from the $\overline  {W^{MM \to 3ob}}$ to simplify the x-axis.\relax }}{5}}
\@writefile{lof}{\contentsline {figure}{\numberline {8}{\ignorespaces (a) \textbf  {7}'s potential energy ``forward'' ($P_{mm}$) and ``backward'' ($P_{3ob}$) distributions plotted as ``offset'' from the $\overline  {\Delta U^{MM \to 3ob}}$ to simplify the x-axis. (b) \textbf  {7}'s nonequilibrium work ``forward'' ($P_{mm}$) and ``backward'' ($P_{3ob}$) distributions plotted as ``offset'' from the $\overline  {W^{MM \to 3ob}}$ to simplify the x-axis.\relax }}{6}}
\@writefile{lof}{\contentsline {figure}{\numberline {9}{\ignorespaces (a) \textbf  {8}'s potential energy ``forward'' ($P_{mm}$) and ``backward'' ($P_{3ob}$) distributions plotted as ``offset'' from the $\overline  {\Delta U^{MM \to 3ob}}$ to simplify the x-axis. (b) \textbf  {8}'s nonequilibrium work ``forward'' ($P_{mm}$) and ``backward'' ($P_{3ob}$) distributions plotted as ``offset'' from the $\overline  {W^{MM \to 3ob}}$ to simplify the x-axis.\relax }}{6}}
\@writefile{lof}{\contentsline {figure}{\numberline {10}{\ignorespaces (a) \textbf  {9}'s potential energy ``forward'' ($P_{mm}$) and ``backward'' ($P_{3ob}$) distributions plotted as ``offset'' from the $\overline  {\Delta U^{MM \to 3ob}}$ to simplify the x-axis. (b) \textbf  {9}'s nonequilibrium work ``forward'' ($P_{mm}$) and ``backward'' ($P_{3ob}$) distributions plotted as ``offset'' from the $\overline  {W^{MM \to 3ob}}$ to simplify the x-axis.\relax }}{7}}
\@writefile{lof}{\contentsline {figure}{\numberline {11}{\ignorespaces (a) \textbf  {10}'s potential energy ``forward'' ($P_{mm}$) and ``backward'' ($P_{3ob}$) distributions plotted as ``offset'' from the $\overline  {\Delta U^{MM \to 3ob}}$ to simplify the x-axis. (b) \textbf  {10}'s nonequilibrium work ``forward'' ($P_{mm}$) and ``backward'' ($P_{3ob}$) distributions plotted as ``offset'' from the $\overline  {W^{MM \to 3ob}}$ to simplify the x-axis.\relax }}{7}}
\@writefile{lof}{\contentsline {figure}{\numberline {12}{\ignorespaces (a) \textbf  {11}'s potential energy ``forward'' ($P_{mm}$) and ``backward'' ($P_{3ob}$) distributions plotted as ``offset'' from the $\overline  {\Delta U^{MM \to 3ob}}$ to simplify the x-axis. (b) \textbf  {11}'s nonequilibrium work ``forward'' ($P_{mm}$) and ``backward'' ($P_{3ob}$) distributions plotted as ``offset'' from the $\overline  {W^{MM \to 3ob}}$ to simplify the x-axis.\relax }}{8}}
\@writefile{lof}{\contentsline {figure}{\numberline {13}{\ignorespaces (a) \textbf  {12}'s potential energy ``forward'' ($P_{mm}$) and ``backward'' ($P_{3ob}$) distributions plotted as ``offset'' from the $\overline  {\Delta U^{MM \to 3ob}}$ to simplify the x-axis. (b) \textbf  {12}'s nonequilibrium work ``forward'' ($P_{mm}$) and ``backward'' ($P_{3ob}$) distributions plotted as ``offset'' from the $\overline  {W^{MM \to 3ob}}$ to simplify the x-axis.\relax }}{8}}
\@writefile{lof}{\contentsline {figure}{\numberline {14}{\ignorespaces (a) \textbf  {13}'s potential energy ``forward'' ($P_{mm}$) and ``backward'' ($P_{3ob}$) distributions plotted as ``offset'' from the $\overline  {\Delta U^{MM \to 3ob}}$ to simplify the x-axis. (b) \textbf  {13}'s nonequilibrium work ``forward'' ($P_{mm}$) and ``backward'' ($P_{3ob}$) distributions plotted as ``offset'' from the $\overline  {W^{MM \to 3ob}}$ to simplify the x-axis.\relax }}{9}}
\@writefile{lof}{\contentsline {figure}{\numberline {15}{\ignorespaces (a) \textbf  {14}'s potential energy ``forward'' ($P_{mm}$) and ``backward'' ($P_{3ob}$) distributions plotted as ``offset'' from the $\overline  {\Delta U^{MM \to 3ob}}$ to simplify the x-axis. (b) \textbf  {14}'s nonequilibrium work ``forward'' ($P_{mm}$) and ``backward'' ($P_{3ob}$) distributions plotted as ``offset'' from the $\overline  {W^{MM \to 3ob}}$ to simplify the x-axis.\relax }}{9}}
\@writefile{lof}{\contentsline {figure}{\numberline {16}{\ignorespaces (a) \textbf  {15}'s potential energy ``forward'' ($P_{mm}$) and ``backward'' ($P_{3ob}$) distributions plotted as ``offset'' from the $\overline  {\Delta U^{MM \to 3ob}}$ to simplify the x-axis. (b) \textbf  {15}'s nonequilibrium work ``forward'' ($P_{mm}$) and ``backward'' ($P_{3ob}$) distributions plotted as ``offset'' from the $\overline  {W^{MM \to 3ob}}$ to simplify the x-axis.\relax }}{10}}
\@writefile{lof}{\contentsline {figure}{\numberline {17}{\ignorespaces (a) \textbf  {16}'s potential energy ``forward'' ($P_{mm}$) and ``backward'' ($P_{3ob}$) distributions plotted as ``offset'' from the $\overline  {\Delta U^{MM \to 3ob}}$ to simplify the x-axis. (b) \textbf  {16}'s nonequilibrium work ``forward'' ($P_{mm}$) and ``backward'' ($P_{3ob}$) distributions plotted as ``offset'' from the $\overline  {W^{MM \to 3ob}}$ to simplify the x-axis.\relax }}{10}}
\@writefile{lof}{\contentsline {figure}{\numberline {18}{\ignorespaces (a) \textbf  {17}'s potential energy ``forward'' ($P_{mm}$) and ``backward'' ($P_{3ob}$) distributions plotted as ``offset'' from the $\overline  {\Delta U^{MM \to 3ob}}$ to simplify the x-axis. (b) \textbf  {17}'s nonequilibrium work ``forward'' ($P_{mm}$) and ``backward'' ($P_{3ob}$) distributions plotted as ``offset'' from the $\overline  {W^{MM \to 3ob}}$ to simplify the x-axis.\relax }}{11}}
\@writefile{lof}{\contentsline {figure}{\numberline {19}{\ignorespaces (a) \textbf  {18}'s potential energy ``forward'' ($P_{mm}$) and ``backward'' ($P_{3ob}$) distributions plotted as ``offset'' from the $\overline  {\Delta U^{MM \to 3ob}}$ to simplify the x-axis. (b) \textbf  {18}'s nonequilibrium work ``forward'' ($P_{mm}$) and ``backward'' ($P_{3ob}$) distributions plotted as ``offset'' from the $\overline  {W^{MM \to 3ob}}$ to simplify the x-axis.\relax }}{11}}
\@writefile{lof}{\contentsline {figure}{\numberline {20}{\ignorespaces (a) \textbf  {19}'s potential energy ``forward'' ($P_{mm}$) and ``backward'' ($P_{3ob}$) distributions plotted as ``offset'' from the $\overline  {\Delta U^{MM \to 3ob}}$ to simplify the x-axis. (b) \textbf  {19}'s nonequilibrium work ``forward'' ($P_{mm}$) and ``backward'' ($P_{3ob}$) distributions plotted as ``offset'' from the $\overline  {W^{MM \to 3ob}}$ to simplify the x-axis.\relax }}{12}}
\@writefile{lof}{\contentsline {figure}{\numberline {21}{\ignorespaces (a) \textbf  {20}'s potential energy ``forward'' ($P_{mm}$) and ``backward'' ($P_{3ob}$) distributions plotted as ``offset'' from the $\overline  {\Delta U^{MM \to 3ob}}$ to simplify the x-axis. (b) \textbf  {20}'s nonequilibrium work ``forward'' ($P_{mm}$) and ``backward'' ($P_{3ob}$) distributions plotted as ``offset'' from the $\overline  {W^{MM \to 3ob}}$ to simplify the x-axis.\relax }}{12}}
\@writefile{lof}{\contentsline {figure}{\numberline {22}{\ignorespaces (a) \textbf  {21}'s potential energy ``forward'' ($P_{mm}$) and ``backward'' ($P_{3ob}$) distributions plotted as ``offset'' from the $\overline  {\Delta U^{MM \to 3ob}}$ to simplify the x-axis. (b) \textbf  {21}'s nonequilibrium work ``forward'' ($P_{mm}$) and ``backward'' ($P_{3ob}$) distributions plotted as ``offset'' from the $\overline  {W^{MM \to 3ob}}$ to simplify the x-axis.\relax }}{13}}
\@writefile{lof}{\contentsline {figure}{\numberline {23}{\ignorespaces (a) \textbf  {22}'s potential energy ``forward'' ($P_{mm}$) and ``backward'' ($P_{3ob}$) distributions plotted as ``offset'' from the $\overline  {\Delta U^{MM \to 3ob}}$ to simplify the x-axis. (b) \textbf  {22}'s nonequilibrium work ``forward'' ($P_{mm}$) and ``backward'' ($P_{3ob}$) distributions plotted as ``offset'' from the $\overline  {W^{MM \to 3ob}}$ to simplify the x-axis.\relax }}{13}}
\@writefile{lof}{\contentsline {figure}{\numberline {24}{\ignorespaces Dihedral distributions of molecule \textbf  {1}.\relax }}{14}}
\@writefile{lof}{\contentsline {figure}{\numberline {25}{\ignorespaces Dihedral distributions of molecule \textbf  {2}.\relax }}{14}}
\@writefile{lof}{\contentsline {figure}{\numberline {26}{\ignorespaces Dihedral distributions of molecule \textbf  {3}.\relax }}{15}}
\@writefile{lof}{\contentsline {figure}{\numberline {27}{\ignorespaces Dihedral distributions of molecule \textbf  {5}.\relax }}{16}}
\@writefile{lof}{\contentsline {figure}{\numberline {28}{\ignorespaces Dihedral distributions of molecule \textbf  {6}.\relax }}{17}}
\@writefile{lof}{\contentsline {figure}{\numberline {29}{\ignorespaces Dihedral distributions of molecule \textbf  {7}.\relax }}{18}}
\@writefile{lof}{\contentsline {figure}{\numberline {30}{\ignorespaces Dihedral distributions of molecule \textbf  {8}.\relax }}{18}}
\@writefile{lof}{\contentsline {figure}{\numberline {31}{\ignorespaces Dihedral distributions of molecule \textbf  {9}.\relax }}{19}}
\@writefile{lof}{\contentsline {figure}{\numberline {32}{\ignorespaces Dihedral distributions of molecule \textbf  {10}.\relax }}{20}}
\@writefile{lof}{\contentsline {figure}{\numberline {33}{\ignorespaces Dihedral distributions of molecule \textbf  {11}.\relax }}{20}}
\@writefile{lof}{\contentsline {figure}{\numberline {34}{\ignorespaces Dihedral distributions of molecule \textbf  {13}.\relax }}{21}}
\@writefile{lof}{\contentsline {figure}{\numberline {35}{\ignorespaces Dihedral distributions of molecule \textbf  {14}.\relax }}{21}}
\@writefile{lof}{\contentsline {figure}{\numberline {36}{\ignorespaces Dihedral distributions of molecule \textbf  {16}.\relax }}{22}}
\@writefile{lof}{\contentsline {figure}{\numberline {37}{\ignorespaces Dihedral distributions of molecule \textbf  {17}.\relax }}{23}}
\@writefile{lof}{\contentsline {figure}{\numberline {38}{\ignorespaces Dihedral distributions of molecule \textbf  {18}.\relax }}{24}}
\@writefile{lof}{\contentsline {figure}{\numberline {39}{\ignorespaces Dihedral distributions of molecule \textbf  {19}.\relax }}{25}}
\@writefile{lof}{\contentsline {figure}{\numberline {40}{\ignorespaces Dihedral distributions of molecule \textbf  {20}.\relax }}{26}}
\@writefile{lof}{\contentsline {figure}{\numberline {41}{\ignorespaces Dihedral distributions of molecule \textbf  {21}.\relax }}{26}}
\@writefile{lof}{\contentsline {figure}{\numberline {42}{\ignorespaces Dihedral distributions of molecule \textbf  {22}.\relax }}{27}}
