# Supplementary material for: The Good, the Bad, and the Ugly: “HiPen”, a New Dataset for Validating (S)QM/MM Free Energy Simulations
Source: Molecules. 2019 Feb 14;24(4):681. doi: 10.3390/molecules24040681 (PMC6413162; doi:10.3390/molecules24040681)
Supplement: Supplementary file 1 [file molecules-24-00681-s001.zip › final-SI/hipen22.log]

This is pdfTeX, Version 3.14159265-2.6-1.40.18 (TeX Live 2017/Debian) (preloaded format=pdflatex 2018.11.8)  13 FEB 2019 20:42
entering extended mode
 restricted \write18 enabled.
 %&-line parsing enabled.
**hipen22.tex
(./hipen22.tex
LaTeX2e <2017-04-15>
Babel <3.18> and hyphenation patterns for 84 language(s) loaded.
(/home/hlwood/texmf/tex/latex/achemso/achemso.cls
Document Class: achemso 2018/09/15 v3.12 Submission to ACS journals
(/usr/share/texlive/texmf-dist/tex/latex/base/article.cls
Document Class: article 2014/09/29 v1.4h Standard LaTeX document class
(/usr/share/texlive/texmf-dist/tex/latex/base/size12.clo
File: size12.clo 2014/09/29 v1.4h Standard LaTeX file (size option)
)
\c@part=\count79
\c@section=\count80
\c@subsection=\count81
\c@subsubsection=\count82
\c@paragraph=\count83
\c@subparagraph=\count84
\c@figure=\count85
\c@table=\count86
\abovecaptionskip=\skip41
\belowcaptionskip=\skip42
\bibindent=\dimen102
)
(/usr/share/texlive/texmf-dist/tex/latex/xkeyval/xkeyval.sty
Package: xkeyval 2014/12/03 v2.7a package option processing (HA)

(/usr/share/texlive/texmf-dist/tex/generic/xkeyval/xkeyval.tex
(/usr/share/texlive/texmf-dist/tex/generic/xkeyval/xkvutils.tex
\XKV@toks=\toks14
\XKV@tempa@toks=\toks15

(/usr/share/texlive/texmf-dist/tex/generic/xkeyval/keyval.tex))
\XKV@depth=\count87
File: xkeyval.tex 2014/12/03 v2.7a key=value parser (HA)
))
\acs@bib@file=\write3
\c@bibnote=\count88

(/usr/share/texlive/texmf-dist/tex/latex/geometry/geometry.sty
Package: geometry 2010/09/12 v5.6 Page Geometry

(/usr/share/texlive/texmf-dist/tex/generic/oberdiek/ifpdf.sty
Package: ifpdf 2017/03/15 v3.2 Provides the ifpdf switch
)
(/usr/share/texlive/texmf-dist/tex/generic/oberdiek/ifvtex.sty
Package: ifvtex 2016/05/16 v1.6 Detect VTeX and its facilities (HO)
Package ifvtex Info: VTeX not detected.
)
(/usr/share/texlive/texmf-dist/tex/generic/ifxetex/ifxetex.sty
Package: ifxetex 2010/09/12 v0.6 Provides ifxetex conditional
)
\Gm@cnth=\count89
\Gm@cntv=\count90
\c@Gm@tempcnt=\count91
\Gm@bindingoffset=\dimen103
\Gm@wd@mp=\dimen104
\Gm@odd@mp=\dimen105
\Gm@even@mp=\dimen106
\Gm@layoutwidth=\dimen107
\Gm@layoutheight=\dimen108
\Gm@layouthoffset=\dimen109
\Gm@layoutvoffset=\dimen110
\Gm@dimlist=\toks16
)
(/usr/share/texlive/texmf-dist/tex/latex/caption/caption.sty
Package: caption 2016/02/21 v3.3-144 Customizing captions (AR)

(/usr/share/texlive/texmf-dist/tex/latex/caption/caption3.sty
Package: caption3 2016/05/22 v1.7-166 caption3 kernel (AR)
Package caption3 Info: TeX engine: e-TeX on input line 67.
\captionmargin=\dimen111
\captionmargin@=\dimen112
\captionwidth=\dimen113
\caption@tempdima=\dimen114
\caption@indent=\dimen115
\caption@parindent=\dimen116
\caption@hangindent=\dimen117
)
\c@ContinuedFloat=\count92
)
(/usr/share/texlive/texmf-dist/tex/latex/float/float.sty
Package: float 2001/11/08 v1.3d Float enhancements (AL)
\c@float@type=\count93
\float@exts=\toks17
\float@box=\box26
\@float@everytoks=\toks18
\@floatcapt=\box27
)
(/usr/share/texlive/texmf-dist/tex/latex/graphics/graphicx.sty
Package: graphicx 2017/06/01 v1.1a Enhanced LaTeX Graphics (DPC,SPQR)

(/usr/share/texlive/texmf-dist/tex/latex/graphics/graphics.sty
Package: graphics 2017/06/25 v1.2c Standard LaTeX Graphics (DPC,SPQR)

(/usr/share/texlive/texmf-dist/tex/latex/graphics/trig.sty
Package: trig 2016/01/03 v1.10 sin cos tan (DPC)
)
(/usr/share/texlive/texmf-dist/tex/latex/graphics-cfg/graphics.cfg
File: graphics.cfg 2016/06/04 v1.11 sample graphics configuration
)
Package graphics Info: Driver file: pdftex.def on input line 99.

(/usr/share/texlive/texmf-dist/tex/latex/graphics-def/pdftex.def
File: pdftex.def 2018/01/08 v1.0l Graphics/color driver for pdftex
))
\Gin@req@height=\dimen118
\Gin@req@width=\dimen119
)
(/usr/share/texlive/texmf-dist/tex/latex/setspace/setspace.sty
Package: setspace 2011/12/19 v6.7a set line spacing
)
(/usr/share/texlive/texmf-dist/tex/latex/url/url.sty
\Urlmuskip=\muskip10
Package: url 2013/09/16  ver 3.4  Verb mode for urls, etc.
)
\acs@author@cnt=\count94
\acs@affil@cnt=\count95
\acs@affil@alt@cnt=\count96
\acs@footnote@cnt=\count97
\acs@affil@marker@cnt=\count98
\acs@space@pre@title=\skip43
\acs@space@post@title=\skip44
\acs@space@post@author=\skip45
\acs@space@post@address=\skip46
\acs@space@post@email=\skip47
\acs@maketitle@width=\skip48
\@float@every@scheme=\toks19
\c@scheme=\count99
\@float@every@chart=\toks20
\c@chart=\count100
\@float@every@graph=\toks21
\c@graph=\count101
\@float@every@table=\toks22
\acs@collect@toks=\toks23
\acs@collect@empty@toks=\toks24
\acs@tocentry@height=\skip49
\acs@tocentry@width=\skip50

(/home/hlwood/texmf/tex/latex/achemso/achemso-jctcce.cfg
File: achemso-jctcce.cfg 2018/09/15 v3.12 achemso configuration: J. Chem. Theor
y Comput.
)
(/usr/share/texlive/texmf-dist/tex/latex/natbib/natbib.sty
Package: natbib 2010/09/13 8.31b (PWD, AO)
\bibhang=\skip51
\bibsep=\skip52
LaTeX Info: Redefining \cite on input line 694.
\c@NAT@ctr=\count102
)
(/home/hlwood/texmf/tex/latex/achemso/natmove.sty
Package: natmove 2010/01/15 v1.1a Automatic citation moving with natbib
)
(/usr/share/texlive/texmf-dist/tex/latex/mciteplus/mciteplus.sty
Package: mciteplus 2013/09/13 v1.2 enhanced mcite
\@mcitetmptoksA=\toks25
\@mcitetmpdima=\dimen120
\@mcitetmpdimb=\dimen121
\@mcitetmpcnta=\count103
\@mcitetmpcntb=\count104
\c@mcitebibitemcount=\count105
\c@mcitesubitemcount=\count106

** mciteplus: Detected natbib.sty. Invoking hooks.
)) (/usr/share/texlive/texmf-dist/tex/latex/lineno/lineno.sty
Package: lineno 2005/11/02 line numbers on paragraphs v4.41
\linenopenalty=\count107
\output=\toks26
\linenoprevgraf=\count108
\linenumbersep=\dimen122
\linenumberwidth=\dimen123
\c@linenumber=\count109
\c@pagewiselinenumber=\count110
\c@LN@truepage=\count111
\c@internallinenumber=\count112
\c@internallinenumbers=\count113
\quotelinenumbersep=\dimen124
\bframerule=\dimen125
\bframesep=\dimen126
\bframebox=\box28
LaTeX Info: Redefining \\ on input line 3056.
)
(/usr/share/texlive/texmf-dist/tex/latex/tools/dcolumn.sty
Package: dcolumn 2014/10/28 v1.06 decimal alignment package (DPC)

(/usr/share/texlive/texmf-dist/tex/latex/tools/array.sty
Package: array 2016/10/06 v2.4d Tabular extension package (FMi)
\col@sep=\dimen127
\extrarowheight=\dimen128
\NC@list=\toks27
\extratabsurround=\skip53
\backup@length=\skip54
))
(/usr/share/texlive/texmf-dist/tex/latex/amsmath/amsmath.sty
Package: amsmath 2017/09/02 v2.17a AMS math features
\@mathmargin=\skip55

For additional information on amsmath, use the `?' option.
(/usr/share/texlive/texmf-dist/tex/latex/amsmath/amstext.sty
Package: amstext 2000/06/29 v2.01 AMS text

(/usr/share/texlive/texmf-dist/tex/latex/amsmath/amsgen.sty
File: amsgen.sty 1999/11/30 v2.0 generic functions
\@emptytoks=\toks28
\ex@=\dimen129
))
(/usr/share/texlive/texmf-dist/tex/latex/amsmath/amsbsy.sty
Package: amsbsy 1999/11/29 v1.2d Bold Symbols
\pmbraise@=\dimen130
)
(/usr/share/texlive/texmf-dist/tex/latex/amsmath/amsopn.sty
Package: amsopn 2016/03/08 v2.02 operator names
)
\inf@bad=\count114
LaTeX Info: Redefining \frac on input line 213.
\uproot@=\count115
\leftroot@=\count116
LaTeX Info: Redefining \overline on input line 375.
\classnum@=\count117
\DOTSCASE@=\count118
LaTeX Info: Redefining \ldots on input line 472.
LaTeX Info: Redefining \dots on input line 475.
LaTeX Info: Redefining \cdots on input line 596.
\Mathstrutbox@=\box29
\strutbox@=\box30
\big@size=\dimen131
LaTeX Font Info:    Redeclaring font encoding OML on input line 712.
LaTeX Font Info:    Redeclaring font encoding OMS on input line 713.
\macc@depth=\count119
\c@MaxMatrixCols=\count120
\dotsspace@=\muskip11
\c@parentequation=\count121
\dspbrk@lvl=\count122
\tag@help=\toks29
\row@=\count123
\column@=\count124
\maxfields@=\count125
\andhelp@=\toks30
\eqnshift@=\dimen132
\alignsep@=\dimen133
\tagshift@=\dimen134
\tagwidth@=\dimen135
\totwidth@=\dimen136
\lineht@=\dimen137
\@envbody=\toks31
\multlinegap=\skip56
\multlinetaggap=\skip57
\mathdisplay@stack=\toks32
LaTeX Info: Redefining \[ on input line 2817.
LaTeX Info: Redefining \] on input line 2818.
)
(/usr/share/texlive/texmf-dist/tex/latex/amsfonts/amssymb.sty
Package: amssymb 2013/01/14 v3.01 AMS font symbols

(/usr/share/texlive/texmf-dist/tex/latex/amsfonts/amsfonts.sty
Package: amsfonts 2013/01/14 v3.01 Basic AMSFonts support
\symAMSa=\mathgroup4
\symAMSb=\mathgroup5
LaTeX Font Info:    Overwriting math alphabet `\mathfrak' in version `bold'
(Font)                  U/euf/m/n --> U/euf/b/n on input line 106.
))
(/usr/share/texlive/texmf-dist/tex/latex/graphics/lscape.sty
Package: lscape 2000/10/22 v3.01 Landscape Pages (DPC)
)
(/usr/share/texlive/texmf-dist/tex/latex/tools/xspace.sty
Package: xspace 2014/10/28 v1.13 Space after command names (DPC,MH)
)
(/usr/share/texlive/texmf-dist/tex/latex/graphics/rotating.sty
Package: rotating 2016/08/11 v2.16d rotated objects in LaTeX

(/usr/share/texlive/texmf-dist/tex/latex/base/ifthen.sty
Package: ifthen 2014/09/29 v1.1c Standard LaTeX ifthen package (DPC)
)
\c@r@tfl@t=\count126
\rotFPtop=\skip58
\rotFPbot=\skip59
\rot@float@box=\box31
\rot@mess@toks=\toks33
)
(/usr/share/texlive/texmf-dist/tex/latex/graphics/color.sty
Package: color 2016/07/10 v1.1e Standard LaTeX Color (DPC)

(/usr/share/texlive/texmf-dist/tex/latex/graphics-cfg/color.cfg
File: color.cfg 2016/01/02 v1.6 sample color configuration
)
Package color Info: Driver file: pdftex.def on input line 147.
)
(/usr/share/texlive/texmf-dist/tex/latex/xcolor/xcolor.sty
Package: xcolor 2016/05/11 v2.12 LaTeX color extensions (UK)

(/usr/share/texlive/texmf-dist/tex/latex/graphics-cfg/color.cfg
File: color.cfg 2016/01/02 v1.6 sample color configuration
)
Package xcolor Info: Package option `usenames' ignored on input line 216.
Package xcolor Info: Driver file: pdftex.def on input line 225.
LaTeX Info: Redefining \color on input line 709.
Package xcolor Info: Model `cmy' substituted by `cmy0' on input line 1348.
Package xcolor Info: Model `hsb' substituted by `rgb' on input line 1352.
Package xcolor Info: Model `RGB' extended on input line 1364.
Package xcolor Info: Model `HTML' substituted by `rgb' on input line 1366.
Package xcolor Info: Model `Hsb' substituted by `hsb' on input line 1367.
Package xcolor Info: Model `tHsb' substituted by `hsb' on input line 1368.
Package xcolor Info: Model `HSB' substituted by `hsb' on input line 1369.
Package xcolor Info: Model `Gray' substituted by `gray' on input line 1370.
Package xcolor Info: Model `wave' substituted by `hsb' on input line 1371.

(/usr/share/texlive/texmf-dist/tex/latex/graphics/dvipsnam.def
File: dvipsnam.def 2016/06/17 v3.0m Driver-dependent file (DPC,SPQR)
))
(/home/hlwood/texmf/tex/latex/pgf/frontendlayer/tikz.sty
(/home/hlwood/texmf/tex/latex/pgf/basiclayer/pgf.sty
(/home/hlwood/texmf/tex/latex/pgf/utilities/pgfrcs.sty
(/home/hlwood/texmf/tex/generic/pgf/utilities/pgfutil-common.tex
\pgfutil@everybye=\toks34
\pgfutil@tempdima=\dimen138
\pgfutil@tempdimb=\dimen139

(/home/hlwood/texmf/tex/generic/pgf/utilities/pgfutil-common-lists.tex))
(/home/hlwood/texmf/tex/generic/pgf/utilities/pgfutil-latex.def
\pgfutil@abb=\box32

(/usr/share/texlive/texmf-dist/tex/latex/ms/everyshi.sty
Package: everyshi 2001/05/15 v3.00 EveryShipout Package (MS)
))
(/home/hlwood/texmf/tex/generic/pgf/utilities/pgfrcs.code.tex
Package: pgfrcs 2015/08/07 v3.0.1a (rcs-revision 1.31)
))
Package: pgf 2015/08/07 v3.0.1a (rcs-revision 1.15)

(/home/hlwood/texmf/tex/latex/pgf/basiclayer/pgfcore.sty
(/home/hlwood/texmf/tex/latex/pgf/systemlayer/pgfsys.sty
(/home/hlwood/texmf/tex/generic/pgf/systemlayer/pgfsys.code.tex
Package: pgfsys 2014/07/09 v3.0.1a (rcs-revision 1.48)

(/home/hlwood/texmf/tex/generic/pgf/utilities/pgfkeys.code.tex
\pgfkeys@pathtoks=\toks35
\pgfkeys@temptoks=\toks36

(/home/hlwood/texmf/tex/generic/pgf/utilities/pgfkeysfiltered.code.tex
\pgfkeys@tmptoks=\toks37
))
\pgf@x=\dimen140
\pgf@y=\dimen141
\pgf@xa=\dimen142
\pgf@ya=\dimen143
\pgf@xb=\dimen144
\pgf@yb=\dimen145
\pgf@xc=\dimen146
\pgf@yc=\dimen147
\w@pgf@writea=\write4
\r@pgf@reada=\read1
\c@pgf@counta=\count127
\c@pgf@countb=\count128
\c@pgf@countc=\count129
\c@pgf@countd=\count130
\t@pgf@toka=\toks38
\t@pgf@tokb=\toks39
\t@pgf@tokc=\toks40

(/home/hlwood/texmf/tex/generic/pgf/systemlayer/pgf.cfg
File: pgf.cfg 2008/05/14  (rcs-revision 1.7)
)
Driver file for pgf: pgfsys-pdftex.def

(/home/hlwood/texmf/tex/generic/pgf/systemlayer/pgfsys-pdftex.def
File: pgfsys-pdftex.def 2014/10/11  (rcs-revision 1.35)

(/home/hlwood/texmf/tex/generic/pgf/systemlayer/pgfsys-common-pdf.def
File: pgfsys-common-pdf.def 2013/10/10  (rcs-revision 1.13)
)))
(/home/hlwood/texmf/tex/generic/pgf/systemlayer/pgfsyssoftpath.code.tex
File: pgfsyssoftpath.code.tex 2013/09/09  (rcs-revision 1.9)
\pgfsyssoftpath@smallbuffer@items=\count131
\pgfsyssoftpath@bigbuffer@items=\count132
)
(/home/hlwood/texmf/tex/generic/pgf/systemlayer/pgfsysprotocol.code.tex
File: pgfsysprotocol.code.tex 2006/10/16  (rcs-revision 1.4)
))
(/home/hlwood/texmf/tex/generic/pgf/basiclayer/pgfcore.code.tex
Package: pgfcore 2010/04/11 v3.0.1a (rcs-revision 1.7)

(/home/hlwood/texmf/tex/generic/pgf/math/pgfmath.code.tex
(/home/hlwood/texmf/tex/generic/pgf/math/pgfmathcalc.code.tex
(/home/hlwood/texmf/tex/generic/pgf/math/pgfmathutil.code.tex)
(/home/hlwood/texmf/tex/generic/pgf/math/pgfmathparser.code.tex
\pgfmath@dimen=\dimen148
\pgfmath@count=\count133
\pgfmath@box=\box33
\pgfmath@toks=\toks41
\pgfmath@stack@operand=\toks42
\pgfmath@stack@operation=\toks43
)
(/home/hlwood/texmf/tex/generic/pgf/math/pgfmathfunctions.code.tex
(/home/hlwood/texmf/tex/generic/pgf/math/pgfmathfunctions.basic.code.tex)
(/home/hlwood/texmf/tex/generic/pgf/math/pgfmathfunctions.trigonometric.code.te
x) (/home/hlwood/texmf/tex/generic/pgf/math/pgfmathfunctions.random.code.tex)
(/home/hlwood/texmf/tex/generic/pgf/math/pgfmathfunctions.comparison.code.tex)
(/home/hlwood/texmf/tex/generic/pgf/math/pgfmathfunctions.base.code.tex)
(/home/hlwood/texmf/tex/generic/pgf/math/pgfmathfunctions.round.code.tex)
(/home/hlwood/texmf/tex/generic/pgf/math/pgfmathfunctions.misc.code.tex)
(/home/hlwood/texmf/tex/generic/pgf/math/pgfmathfunctions.integerarithmetics.co
de.tex))) (/home/hlwood/texmf/tex/generic/pgf/math/pgfmathfloat.code.tex
\c@pgfmathroundto@lastzeros=\count134
))
(/home/hlwood/texmf/tex/generic/pgf/basiclayer/pgfcorepoints.code.tex
File: pgfcorepoints.code.tex 2013/10/07  (rcs-revision 1.27)
\pgf@picminx=\dimen149
\pgf@picmaxx=\dimen150
\pgf@picminy=\dimen151
\pgf@picmaxy=\dimen152
\pgf@pathminx=\dimen153
\pgf@pathmaxx=\dimen154
\pgf@pathminy=\dimen155
\pgf@pathmaxy=\dimen156
\pgf@xx=\dimen157
\pgf@xy=\dimen158
\pgf@yx=\dimen159
\pgf@yy=\dimen160
\pgf@zx=\dimen161
\pgf@zy=\dimen162
)
(/home/hlwood/texmf/tex/generic/pgf/basiclayer/pgfcorepathconstruct.code.tex
File: pgfcorepathconstruct.code.tex 2013/10/07  (rcs-revision 1.29)
\pgf@path@lastx=\dimen163
\pgf@path@lasty=\dimen164
)
(/home/hlwood/texmf/tex/generic/pgf/basiclayer/pgfcorepathusage.code.tex
File: pgfcorepathusage.code.tex 2014/11/02  (rcs-revision 1.24)
\pgf@shorten@end@additional=\dimen165
\pgf@shorten@start@additional=\dimen166
)
(/home/hlwood/texmf/tex/generic/pgf/basiclayer/pgfcorescopes.code.tex
File: pgfcorescopes.code.tex 2015/05/08  (rcs-revision 1.46)
\pgfpic=\box34
\pgf@hbox=\box35
\pgf@layerbox@main=\box36
\pgf@picture@serial@count=\count135
)
(/home/hlwood/texmf/tex/generic/pgf/basiclayer/pgfcoregraphicstate.code.tex
File: pgfcoregraphicstate.code.tex 2014/11/02  (rcs-revision 1.12)
\pgflinewidth=\dimen167
)
(/home/hlwood/texmf/tex/generic/pgf/basiclayer/pgfcoretransformations.code.tex
File: pgfcoretransformations.code.tex 2015/08/07  (rcs-revision 1.20)
\pgf@pt@x=\dimen168
\pgf@pt@y=\dimen169
\pgf@pt@temp=\dimen170
) (/home/hlwood/texmf/tex/generic/pgf/basiclayer/pgfcorequick.code.tex
File: pgfcorequick.code.tex 2008/10/09  (rcs-revision 1.3)
)
(/home/hlwood/texmf/tex/generic/pgf/basiclayer/pgfcoreobjects.code.tex
File: pgfcoreobjects.code.tex 2006/10/11  (rcs-revision 1.2)
)
(/home/hlwood/texmf/tex/generic/pgf/basiclayer/pgfcorepathprocessing.code.tex
File: pgfcorepathprocessing.code.tex 2013/09/09  (rcs-revision 1.9)
)
(/home/hlwood/texmf/tex/generic/pgf/basiclayer/pgfcorearrows.code.tex
File: pgfcorearrows.code.tex 2015/05/14  (rcs-revision 1.43)
\pgfarrowsep=\dimen171
)
(/home/hlwood/texmf/tex/generic/pgf/basiclayer/pgfcoreshade.code.tex
File: pgfcoreshade.code.tex 2013/07/15  (rcs-revision 1.15)
\pgf@max=\dimen172
\pgf@sys@shading@range@num=\count136
)
(/home/hlwood/texmf/tex/generic/pgf/basiclayer/pgfcoreimage.code.tex
File: pgfcoreimage.code.tex 2013/07/15  (rcs-revision 1.18)

(/home/hlwood/texmf/tex/generic/pgf/basiclayer/pgfcoreexternal.code.tex
File: pgfcoreexternal.code.tex 2014/07/09  (rcs-revision 1.21)
\pgfexternal@startupbox=\box37
))
(/home/hlwood/texmf/tex/generic/pgf/basiclayer/pgfcorelayers.code.tex
File: pgfcorelayers.code.tex 2013/07/18  (rcs-revision 1.7)
)
(/home/hlwood/texmf/tex/generic/pgf/basiclayer/pgfcoretransparency.code.tex
File: pgfcoretransparency.code.tex 2013/09/30  (rcs-revision 1.5)
)
(/home/hlwood/texmf/tex/generic/pgf/basiclayer/pgfcorepatterns.code.tex
File: pgfcorepatterns.code.tex 2013/11/07  (rcs-revision 1.5)
)))
(/home/hlwood/texmf/tex/generic/pgf/modules/pgfmoduleshapes.code.tex
File: pgfmoduleshapes.code.tex 2014/03/21  (rcs-revision 1.35)
\pgfnodeparttextbox=\box38
)
(/home/hlwood/texmf/tex/generic/pgf/modules/pgfmoduleplot.code.tex
File: pgfmoduleplot.code.tex 2015/08/03  (rcs-revision 1.13)
)
(/home/hlwood/texmf/tex/latex/pgf/compatibility/pgfcomp-version-0-65.sty
Package: pgfcomp-version-0-65 2007/07/03 v3.0.1a (rcs-revision 1.7)
\pgf@nodesepstart=\dimen173
\pgf@nodesepend=\dimen174
)
(/home/hlwood/texmf/tex/latex/pgf/compatibility/pgfcomp-version-1-18.sty
Package: pgfcomp-version-1-18 2007/07/23 v3.0.1a (rcs-revision 1.1)
))
(/home/hlwood/texmf/tex/latex/pgf/utilities/pgffor.sty
(/home/hlwood/texmf/tex/latex/pgf/utilities/pgfkeys.sty
(/home/hlwood/texmf/tex/generic/pgf/utilities/pgfkeys.code.tex))
(/home/hlwood/texmf/tex/latex/pgf/math/pgfmath.sty
(/home/hlwood/texmf/tex/generic/pgf/math/pgfmath.code.tex))
(/home/hlwood/texmf/tex/generic/pgf/utilities/pgffor.code.tex
Package: pgffor 2013/12/13 v3.0.1a (rcs-revision 1.25)

(/home/hlwood/texmf/tex/generic/pgf/math/pgfmath.code.tex)
\pgffor@iter=\dimen175
\pgffor@skip=\dimen176
\pgffor@stack=\toks44
\pgffor@toks=\toks45
))
(/home/hlwood/texmf/tex/generic/pgf/frontendlayer/tikz/tikz.code.tex
Package: tikz 2015/08/07 v3.0.1a (rcs-revision 1.151)

(/home/hlwood/texmf/tex/generic/pgf/libraries/pgflibraryplothandlers.code.tex
File: pgflibraryplothandlers.code.tex 2013/08/31 v3.0.1a (rcs-revision 1.20)
\pgf@plot@mark@count=\count137
\pgfplotmarksize=\dimen177
)
\tikz@lastx=\dimen178
\tikz@lasty=\dimen179
\tikz@lastxsaved=\dimen180
\tikz@lastysaved=\dimen181
\tikzleveldistance=\dimen182
\tikzsiblingdistance=\dimen183
\tikz@figbox=\box39
\tikz@figbox@bg=\box40
\tikz@tempbox=\box41
\tikz@tempbox@bg=\box42
\tikztreelevel=\count138
\tikznumberofchildren=\count139
\tikznumberofcurrentchild=\count140
\tikz@fig@count=\count141

(/home/hlwood/texmf/tex/generic/pgf/modules/pgfmodulematrix.code.tex
File: pgfmodulematrix.code.tex 2013/09/17  (rcs-revision 1.8)
\pgfmatrixcurrentrow=\count142
\pgfmatrixcurrentcolumn=\count143
\pgf@matrix@numberofcolumns=\count144
)
\tikz@expandcount=\count145

(/home/hlwood/texmf/tex/generic/pgf/frontendlayer/tikz/libraries/tikzlibrarytop
aths.code.tex
File: tikzlibrarytopaths.code.tex 2008/06/17 v3.0.1a (rcs-revision 1.2)
)))
(/home/hlwood/texmf/tex/generic/pgf/libraries/pgflibraryarrows.meta.code.tex
File: pgflibraryarrows.meta.code.tex 2015/05/13 v3.0.1a (rcs-revision 1.13)
\pgfarrowinset=\dimen184
\pgfarrowlength=\dimen185
\pgfarrowwidth=\dimen186
\pgfarrowlinewidth=\dimen187
)
(/home/hlwood/texmf/tex/generic/pgf/frontendlayer/tikz/libraries/tikzlibrarycal
c.code.tex
File: tikzlibrarycalc.code.tex 2013/07/15 v3.0.1a (rcs-revision 1.9)
)
(/home/hlwood/texmf/tex/generic/pgf/frontendlayer/tikz/libraries/tikzlibrarymat
rix.code.tex
File: tikzlibrarymatrix.code.tex 2013/07/12 v3.0.1a (rcs-revision 1.4)
) (/usr/share/texlive/texmf-dist/tex/latex/soul/soul.sty
Package: soul 2003/11/17 v2.4 letterspacing/underlining (mf)
\SOUL@word=\toks46
\SOUL@lasttoken=\toks47
\SOUL@cmds=\toks48
\SOUL@buffer=\toks49
\SOUL@token=\toks50
\SOUL@spaceskip=\skip60
\SOUL@ttwidth=\dimen188
\SOUL@uldp=\dimen189
\SOUL@ulht=\dimen190
)
(/usr/share/texlive/texmf-dist/tex/latex/caption/subcaption.sty
Package: subcaption 2016/05/22 v1.1-161 Sub-captions (AR)
\c@subfigure=\count146
\c@subtable=\count147
)
(/usr/share/texlive/texmf-dist/tex/latex/adjustbox/adjustbox.sty
Package: adjustbox 2012/05/21 v1.0 Adjusting TeX boxes (trim, clip, ...)

(/usr/share/texlive/texmf-dist/tex/latex/adjustbox/adjcalc.sty
Package: adjcalc 2012/05/16 v1.1 Provides advanced setlength with multiple back
-ends (calc, etex, pgfmath)
)
(/usr/share/texlive/texmf-dist/tex/latex/adjustbox/trimclip.sty
Package: trimclip 2012/05/16 v1.0 Trim and clip general TeX material

(/usr/share/texlive/texmf-dist/tex/latex/collectbox/collectbox.sty
Package: collectbox 2012/05/17 v0.4b Collect macro arguments as boxes
\collectedbox=\box43
)
\tc@llx=\dimen191
\tc@lly=\dimen192
\tc@urx=\dimen193
\tc@ury=\dimen194
Package trimclip Info: Using driver 'tc-pdftex.def'.

(/usr/share/texlive/texmf-dist/tex/latex/adjustbox/tc-pdftex.def
File: tc-pdftex.def 2012/05/13 v1.0 Clipping driver for pdftex
))
\adjbox@Width=\dimen195
\adjbox@Height=\dimen196
\adjbox@Depth=\dimen197
\adjbox@Totalheight=\dimen198

(/usr/share/texlive/texmf-dist/tex/latex/ifoddpage/ifoddpage.sty
Package: ifoddpage 2016/04/23 v1.1 Conditionals for odd/even page detection
\c@checkoddpage=\count148
)
(/usr/share/texlive/texmf-dist/tex/latex/varwidth/varwidth.sty
Package: varwidth 2009/03/30 ver 0.92;  Variable-width minipages
\@vwid@box=\box44
\sift@deathcycles=\count149
\@vwid@loff=\dimen199
\@vwid@roff=\dimen256
)) (./hipen22.aux)
\openout1 = `hipen22.aux'.

LaTeX Font Info:    Checking defaults for OML/cmm/m/it on input line 63.
LaTeX Font Info:    ... okay on input line 63.
LaTeX Font Info:    Checking defaults for T1/cmr/m/n on input line 63.
LaTeX Font Info:    ... okay on input line 63.
LaTeX Font Info:    Checking defaults for OT1/cmr/m/n on input line 63.
LaTeX Font Info:    ... okay on input line 63.
LaTeX Font Info:    Checking defaults for OMS/cmsy/m/n on input line 63.
LaTeX Font Info:    ... okay on input line 63.
LaTeX Font Info:    Checking defaults for OMX/cmex/m/n on input line 63.
LaTeX Font Info:    ... okay on input line 63.
LaTeX Font Info:    Checking defaults for U/cmr/m/n on input line 63.
LaTeX Font Info:    ... okay on input line 63.
\openout3 = `acs-hipen22.bib'.


*geometry* driver: auto-detecting
*geometry* detected driver: pdftex
*geometry* verbose mode - [ preamble ] result:
* driver: pdftex
* paper: <default>
* layout: <same size as paper>
* layoutoffset:(h,v)=(0.0pt,0.0pt)
* modes: 
* h-part:(L,W,R)=(72.2698pt, 469.75539pt, 72.2698pt)
* v-part:(T,H,B)=(72.2698pt, 650.43037pt, 72.2698pt)
* \paperwidth=614.295pt
* \paperheight=794.96999pt
* \textwidth=469.75539pt
* \textheight=650.43037pt
* \oddsidemargin=-0.00018pt
* \evensidemargin=-0.00018pt
* \topmargin=-37.00018pt
* \headheight=12.0pt
* \headsep=25.0pt
* \topskip=12.0pt
* \footskip=30.0pt
* \marginparwidth=44.0pt
* \marginparsep=10.0pt
* \columnsep=10.0pt
* \skip\footins=10.8pt plus 4.0pt minus 2.0pt
* \hoffset=0.0pt
* \voffset=0.0pt
* \mag=1000
* \@twocolumnfalse
* \@twosidefalse
* \@mparswitchfalse
* \@reversemarginfalse
* (1in=72.27pt=25.4mm, 1cm=28.453pt)

Package caption Info: Begin \AtBeginDocument code.
Package caption Info: float package is loaded.
Package caption Info: rotating package is loaded.
Package caption Info: End \AtBeginDocument code.
(/usr/share/texlive/texmf-dist/tex/context/base/mkii/supp-pdf.mkii
[Loading MPS to PDF converter (version 2006.09.02).]
\scratchcounter=\count150
\scratchdimen=\dimen257
\scratchbox=\box45
\nofMPsegments=\count151
\nofMParguments=\count152
\everyMPshowfont=\toks51
\MPscratchCnt=\count153
\MPscratchDim=\dimen258
\MPnumerator=\count154
\makeMPintoPDFobject=\count155
\everyMPtoPDFconversion=\toks52
) (/usr/share/texlive/texmf-dist/tex/latex/oberdiek/epstopdf-base.sty
Package: epstopdf-base 2016/05/15 v2.6 Base part for package epstopdf

(/usr/share/texlive/texmf-dist/tex/generic/oberdiek/infwarerr.sty
Package: infwarerr 2016/05/16 v1.4 Providing info/warning/error messages (HO)
)
(/usr/share/texlive/texmf-dist/tex/latex/oberdiek/grfext.sty
Package: grfext 2016/05/16 v1.2 Manage graphics extensions (HO)

(/usr/share/texlive/texmf-dist/tex/generic/oberdiek/kvdefinekeys.sty
Package: kvdefinekeys 2016/05/16 v1.4 Define keys (HO)

(/usr/share/texlive/texmf-dist/tex/generic/oberdiek/ltxcmds.sty
Package: ltxcmds 2016/05/16 v1.23 LaTeX kernel commands for general use (HO)
)))
(/usr/share/texlive/texmf-dist/tex/latex/oberdiek/kvoptions.sty
Package: kvoptions 2016/05/16 v3.12 Key value format for package options (HO)

(/usr/share/texlive/texmf-dist/tex/generic/oberdiek/kvsetkeys.sty
Package: kvsetkeys 2016/05/16 v1.17 Key value parser (HO)

(/usr/share/texlive/texmf-dist/tex/generic/oberdiek/etexcmds.sty
Package: etexcmds 2016/05/16 v1.6 Avoid name clashes with e-TeX commands (HO)

(/usr/share/texlive/texmf-dist/tex/generic/oberdiek/ifluatex.sty
Package: ifluatex 2016/05/16 v1.4 Provides the ifluatex switch (HO)
Package ifluatex Info: LuaTeX not detected.
)
Package etexcmds Info: Could not find \expanded.
(etexcmds)             That can mean that you are not using pdfTeX 1.50 or
(etexcmds)             that some package has redefined \expanded.
(etexcmds)             In the latter case, load this package earlier.
)))
(/usr/share/texlive/texmf-dist/tex/generic/oberdiek/pdftexcmds.sty
Package: pdftexcmds 2018/01/21 v0.26 Utility functions of pdfTeX for LuaTeX (HO
)
Package pdftexcmds Info: LuaTeX not detected.
Package pdftexcmds Info: \pdf@primitive is available.
Package pdftexcmds Info: \pdf@ifprimitive is available.
Package pdftexcmds Info: \pdfdraftmode found.
)
Package epstopdf-base Info: Redefining graphics rule for `.eps' on input line 4
38.
Package grfext Info: Graphics extension search list:
(grfext)             [.pdf,.png,.jpg,.mps,.jpeg,.jbig2,.jb2,.PDF,.PNG,.JPG,.JPE
G,.JBIG2,.JB2,.eps]
(grfext)             \AppendGraphicsExtensions on input line 456.

(/usr/share/texlive/texmf-dist/tex/latex/latexconfig/epstopdf-sys.cfg
File: epstopdf-sys.cfg 2010/07/13 v1.3 Configuration of (r)epstopdf for TeX Liv
e
))
ABD: EveryShipout initializing macros
LaTeX Font Info:    Try loading font information for U+msa on input line 63.

(/usr/share/texlive/texmf-dist/tex/latex/amsfonts/umsa.fd
File: umsa.fd 2013/01/14 v3.01 AMS symbols A
)
LaTeX Font Info:    Try loading font information for U+msb on input line 63.

(/usr/share/texlive/texmf-dist/tex/latex/amsfonts/umsb.fd
File: umsb.fd 2013/01/14 v3.01 AMS symbols B
) [1

{/var/lib/texmf/fonts/map/pdftex/updmap/pdftex.map}]
<./images/hipen22-chemdraw-11x14-300dpi.png, id=16, 927.465pt x 794.97pt>
File: ./images/hipen22-chemdraw-11x14-300dpi.png Graphic file (type png)
<use ./images/hipen22-chemdraw-11x14-300dpi.png>
Package pdftex.def Info: ./images/hipen22-chemdraw-11x14-300dpi.png  used on in
put line 76.
(pdftex.def)             Requested size: 352.31653pt x 301.98256pt.
<./images/zinc_00061095-mm-3ob-fep-overlap.png, id=17, 361.35pt x 361.35pt>
File: ./images/zinc_00061095-mm-3ob-fep-overlap.png Graphic file (type png)
<use ./images/zinc_00061095-mm-3ob-fep-overlap.png>
Package pdftex.def Info: ./images/zinc_00061095-mm-3ob-fep-overlap.png  used on
 input line 83.
(pdftex.def)             Requested size: 211.38849pt x 211.38614pt.
<./images/zinc_00061095-mm-3ob-jar-overlap.png, id=19, 361.35pt x 361.35pt>
File: ./images/zinc_00061095-mm-3ob-jar-overlap.png Graphic file (type png)
<use ./images/zinc_00061095-mm-3ob-jar-overlap.png>
Package pdftex.def Info: ./images/zinc_00061095-mm-3ob-jar-overlap.png  used on
 input line 87.
(pdftex.def)             Requested size: 211.38849pt x 211.38614pt.
<./images/zinc_00077329-mm-3ob-fep-overlap.png, id=20, 361.35pt x 361.35pt>
File: ./images/zinc_00077329-mm-3ob-fep-overlap.png Graphic file (type png)
<use ./images/zinc_00077329-mm-3ob-fep-overlap.png>
Package pdftex.def Info: ./images/zinc_00077329-mm-3ob-fep-overlap.png  used on
 input line 100.
(pdftex.def)             Requested size: 211.38849pt x 211.38614pt.
<./images/zinc_00077329-mm-3ob-jar-overlap.png, id=21, 361.35pt x 361.35pt>
File: ./images/zinc_00077329-mm-3ob-jar-overlap.png Graphic file (type png)
<use ./images/zinc_00077329-mm-3ob-jar-overlap.png>
Package pdftex.def Info: ./images/zinc_00077329-mm-3ob-jar-overlap.png  used on
 input line 104.
(pdftex.def)             Requested size: 211.38849pt x 211.38614pt.
<./images/zinc_00079729-mm-3ob-fep-overlap.png, id=22, 361.35pt x 361.35pt>
File: ./images/zinc_00079729-mm-3ob-fep-overlap.png Graphic file (type png)
<use ./images/zinc_00079729-mm-3ob-fep-overlap.png>
Package pdftex.def Info: ./images/zinc_00079729-mm-3ob-fep-overlap.png  used on
 input line 117.
(pdftex.def)             Requested size: 211.38849pt x 211.38614pt.
<./images/zinc_00079729-mm-3ob-jar-overlap.png, id=23, 361.35pt x 361.35pt>
File: ./images/zinc_00079729-mm-3ob-jar-overlap.png Graphic file (type png)
<use ./images/zinc_00079729-mm-3ob-jar-overlap.png>
Package pdftex.def Info: ./images/zinc_00079729-mm-3ob-jar-overlap.png  used on
 input line 121.
(pdftex.def)             Requested size: 211.38849pt x 211.38614pt.
<./images/zinc_00086442-mm-3ob-fep-overlap.png, id=24, 361.35pt x 361.35pt>
File: ./images/zinc_00086442-mm-3ob-fep-overlap.png Graphic file (type png)
<use ./images/zinc_00086442-mm-3ob-fep-overlap.png>
Package pdftex.def Info: ./images/zinc_00086442-mm-3ob-fep-overlap.png  used on
 input line 134.
(pdftex.def)             Requested size: 211.38849pt x 211.38614pt.
<./images/zinc_00086442-mm-3ob-jar-overlap.png, id=25, 361.35pt x 361.35pt>
File: ./images/zinc_00086442-mm-3ob-jar-overlap.png Graphic file (type png)
<use ./images/zinc_00086442-mm-3ob-jar-overlap.png>
Package pdftex.def Info: ./images/zinc_00086442-mm-3ob-jar-overlap.png  used on
 input line 138.
(pdftex.def)             Requested size: 211.38849pt x 211.38614pt.
<./images/zinc_00087557-mm-3ob-fep-overlap.png, id=26, 361.35pt x 361.35pt>
File: ./images/zinc_00087557-mm-3ob-fep-overlap.png Graphic file (type png)
<use ./images/zinc_00087557-mm-3ob-fep-overlap.png>
Package pdftex.def Info: ./images/zinc_00087557-mm-3ob-fep-overlap.png  used on
 input line 151.
(pdftex.def)             Requested size: 211.38849pt x 211.38614pt.
<./images/zinc_00087557-mm-3ob-jar-overlap.png, id=27, 361.35pt x 361.35pt>
File: ./images/zinc_00087557-mm-3ob-jar-overlap.png Graphic file (type png)
<use ./images/zinc_00087557-mm-3ob-jar-overlap.png>
Package pdftex.def Info: ./images/zinc_00087557-mm-3ob-jar-overlap.png  used on
 input line 155.
(pdftex.def)             Requested size: 211.38849pt x 211.38614pt.
<./images/zinc_00095858-mm-3ob-fep-overlap.png, id=28, 361.35pt x 361.35pt>
File: ./images/zinc_00095858-mm-3ob-fep-overlap.png Graphic file (type png)
<use ./images/zinc_00095858-mm-3ob-fep-overlap.png>
Package pdftex.def Info: ./images/zinc_00095858-mm-3ob-fep-overlap.png  used on
 input line 168.
(pdftex.def)             Requested size: 211.38849pt x 211.38614pt.
<./images/zinc_00095858-mm-3ob-jar-overlap.png, id=29, 361.35pt x 361.35pt>
File: ./images/zinc_00095858-mm-3ob-jar-overlap.png Graphic file (type png)
<use ./images/zinc_00095858-mm-3ob-jar-overlap.png>
Package pdftex.def Info: ./images/zinc_00095858-mm-3ob-jar-overlap.png  used on
 input line 172.
(pdftex.def)             Requested size: 211.38849pt x 211.38614pt.
<./images/zinc_00107550-mm-3ob-fep-overlap.png, id=30, 361.35pt x 361.35pt>
File: ./images/zinc_00107550-mm-3ob-fep-overlap.png Graphic file (type png)
<use ./images/zinc_00107550-mm-3ob-fep-overlap.png>
Package pdftex.def Info: ./images/zinc_00107550-mm-3ob-fep-overlap.png  used on
 input line 185.
(pdftex.def)             Requested size: 211.38849pt x 211.38614pt.
<./images/zinc_00107550-mm-3ob-jar-overlap.png, id=31, 361.35pt x 361.35pt>
File: ./images/zinc_00107550-mm-3ob-jar-overlap.png Graphic file (type png)
<use ./images/zinc_00107550-mm-3ob-jar-overlap.png>
Package pdftex.def Info: ./images/zinc_00107550-mm-3ob-jar-overlap.png  used on
 input line 189.
(pdftex.def)             Requested size: 211.38849pt x 211.38614pt.
<./images/zinc_00107778-mm-3ob-fep-overlap.png, id=32, 361.35pt x 361.35pt>
File: ./images/zinc_00107778-mm-3ob-fep-overlap.png Graphic file (type png)
<use ./images/zinc_00107778-mm-3ob-fep-overlap.png>
Package pdftex.def Info: ./images/zinc_00107778-mm-3ob-fep-overlap.png  used on
 input line 202.
(pdftex.def)             Requested size: 211.38849pt x 211.38614pt.
<./images/zinc_00107778-mm-3ob-jar-overlap.png, id=33, 361.35pt x 361.35pt>
File: ./images/zinc_00107778-mm-3ob-jar-overlap.png Graphic file (type png)
<use ./images/zinc_00107778-mm-3ob-jar-overlap.png>
Package pdftex.def Info: ./images/zinc_00107778-mm-3ob-jar-overlap.png  used on
 input line 206.
(pdftex.def)             Requested size: 211.38849pt x 211.38614pt.
<./images/zinc_00123162-mm-3ob-fep-overlap.png, id=34, 361.35pt x 361.35pt>
File: ./images/zinc_00123162-mm-3ob-fep-overlap.png Graphic file (type png)
<use ./images/zinc_00123162-mm-3ob-fep-overlap.png>
Package pdftex.def Info: ./images/zinc_00123162-mm-3ob-fep-overlap.png  used on
 input line 219.
(pdftex.def)             Requested size: 211.38849pt x 211.38614pt.
<./images/zinc_00123162-mm-3ob-jar-overlap.png, id=35, 361.35pt x 361.35pt>
File: ./images/zinc_00123162-mm-3ob-jar-overlap.png Graphic file (type png)
<use ./images/zinc_00123162-mm-3ob-jar-overlap.png>
Package pdftex.def Info: ./images/zinc_00123162-mm-3ob-jar-overlap.png  used on
 input line 223.
(pdftex.def)             Requested size: 211.38849pt x 211.38614pt.
<./images/zinc_00133435-mm-3ob-fep-overlap.png, id=36, 361.35pt x 361.35pt>
File: ./images/zinc_00133435-mm-3ob-fep-overlap.png Graphic file (type png)
<use ./images/zinc_00133435-mm-3ob-fep-overlap.png>
Package pdftex.def Info: ./images/zinc_00133435-mm-3ob-fep-overlap.png  used on
 input line 236.
(pdftex.def)             Requested size: 211.38849pt x 211.38614pt.
<./images/zinc_00133435-mm-3ob-jar-overlap.png, id=37, 361.35pt x 361.35pt>
File: ./images/zinc_00133435-mm-3ob-jar-overlap.png Graphic file (type png)
<use ./images/zinc_00133435-mm-3ob-jar-overlap.png>
Package pdftex.def Info: ./images/zinc_00133435-mm-3ob-jar-overlap.png  used on
 input line 240.
(pdftex.def)             Requested size: 211.38849pt x 211.38614pt.
<./images/zinc_00138607-mm-3ob-fep-overlap.png, id=38, 361.35pt x 361.35pt>
File: ./images/zinc_00138607-mm-3ob-fep-overlap.png Graphic file (type png)
<use ./images/zinc_00138607-mm-3ob-fep-overlap.png>
Package pdftex.def Info: ./images/zinc_00138607-mm-3ob-fep-overlap.png  used on
 input line 253.
(pdftex.def)             Requested size: 211.38849pt x 211.38614pt.
<./images/zinc_00138607-mm-3ob-jar-overlap.png, id=39, 361.35pt x 361.35pt>
File: ./images/zinc_00138607-mm-3ob-jar-overlap.png Graphic file (type png)
<use ./images/zinc_00138607-mm-3ob-jar-overlap.png>
Package pdftex.def Info: ./images/zinc_00138607-mm-3ob-jar-overlap.png  used on
 input line 257.
(pdftex.def)             Requested size: 211.38849pt x 211.38614pt.
<./images/zinc_00140610-mm-3ob-fep-overlap.png, id=40, 361.35pt x 361.35pt>
File: ./images/zinc_00140610-mm-3ob-fep-overlap.png Graphic file (type png)
<use ./images/zinc_00140610-mm-3ob-fep-overlap.png>
Package pdftex.def Info: ./images/zinc_00140610-mm-3ob-fep-overlap.png  used on
 input line 270.
(pdftex.def)             Requested size: 211.38849pt x 211.38614pt.
<./images/zinc_00140610-mm-3ob-jar-overlap.png, id=41, 361.35pt x 361.35pt>
File: ./images/zinc_00140610-mm-3ob-jar-overlap.png Graphic file (type png)
<use ./images/zinc_00140610-mm-3ob-jar-overlap.png>
Package pdftex.def Info: ./images/zinc_00140610-mm-3ob-jar-overlap.png  used on
 input line 274.
(pdftex.def)             Requested size: 211.38849pt x 211.38614pt.
<./images/zinc_00164361-mm-3ob-fep-overlap.png, id=42, 361.35pt x 361.35pt>
File: ./images/zinc_00164361-mm-3ob-fep-overlap.png Graphic file (type png)
<use ./images/zinc_00164361-mm-3ob-fep-overlap.png>
Package pdftex.def Info: ./images/zinc_00164361-mm-3ob-fep-overlap.png  used on
 input line 287.
(pdftex.def)             Requested size: 211.38849pt x 211.38614pt.
<./images/zinc_00164361-mm-3ob-jar-overlap.png, id=43, 361.35pt x 361.35pt>
File: ./images/zinc_00164361-mm-3ob-jar-overlap.png Graphic file (type png)
<use ./images/zinc_00164361-mm-3ob-jar-overlap.png>
Package pdftex.def Info: ./images/zinc_00164361-mm-3ob-jar-overlap.png  used on
 input line 291.
(pdftex.def)             Requested size: 211.38849pt x 211.38614pt.
<./images/zinc_00167648-mm-3ob-fep-overlap.png, id=44, 361.35pt x 361.35pt>
File: ./images/zinc_00167648-mm-3ob-fep-overlap.png Graphic file (type png)
<use ./images/zinc_00167648-mm-3ob-fep-overlap.png>
Package pdftex.def Info: ./images/zinc_00167648-mm-3ob-fep-overlap.png  used on
 input line 304.
(pdftex.def)             Requested size: 211.38849pt x 211.38614pt.
<./images/zinc_00167648-mm-3ob-jar-overlap.png, id=45, 361.35pt x 361.35pt>
File: ./images/zinc_00167648-mm-3ob-jar-overlap.png Graphic file (type png)
<use ./images/zinc_00167648-mm-3ob-jar-overlap.png>
Package pdftex.def Info: ./images/zinc_00167648-mm-3ob-jar-overlap.png  used on
 input line 308.
(pdftex.def)             Requested size: 211.38849pt x 211.38614pt.
<./images/zinc_00169358-mm-3ob-fep-overlap.png, id=46, 361.35pt x 361.35pt>
File: ./images/zinc_00169358-mm-3ob-fep-overlap.png Graphic file (type png)
<use ./images/zinc_00169358-mm-3ob-fep-overlap.png>
Package pdftex.def Info: ./images/zinc_00169358-mm-3ob-fep-overlap.png  used on
 input line 321.
(pdftex.def)             Requested size: 211.38849pt x 211.38614pt.
<./images/zinc_00169358-mm-3ob-jar-overlap.png, id=47, 361.35pt x 361.35pt>
File: ./images/zinc_00169358-mm-3ob-jar-overlap.png Graphic file (type png)
<use ./images/zinc_00169358-mm-3ob-jar-overlap.png>
Package pdftex.def Info: ./images/zinc_00169358-mm-3ob-jar-overlap.png  used on
 input line 325.
(pdftex.def)             Requested size: 211.38849pt x 211.38614pt.
<./images/zinc_01755198-mm-3ob-fep-overlap.png, id=48, 361.35pt x 361.35pt>
File: ./images/zinc_01755198-mm-3ob-fep-overlap.png Graphic file (type png)
<use ./images/zinc_01755198-mm-3ob-fep-overlap.png>
Package pdftex.def Info: ./images/zinc_01755198-mm-3ob-fep-overlap.png  used on
 input line 339.
(pdftex.def)             Requested size: 211.38849pt x 211.38614pt.
<./images/zinc_01755198-mm-3ob-jar-overlap.png, id=49, 361.35pt x 361.35pt>
File: ./images/zinc_01755198-mm-3ob-jar-overlap.png Graphic file (type png)
<use ./images/zinc_01755198-mm-3ob-jar-overlap.png>
Package pdftex.def Info: ./images/zinc_01755198-mm-3ob-jar-overlap.png  used on
 input line 343.
(pdftex.def)             Requested size: 211.38849pt x 211.38614pt.
<./images/zinc_01867000-mm-3ob-fep-overlap.png, id=50, 361.35pt x 361.35pt>
File: ./images/zinc_01867000-mm-3ob-fep-overlap.png Graphic file (type png)
<use ./images/zinc_01867000-mm-3ob-fep-overlap.png>
Package pdftex.def Info: ./images/zinc_01867000-mm-3ob-fep-overlap.png  used on
 input line 356.
(pdftex.def)             Requested size: 211.38849pt x 211.38614pt.
<./images/zinc_01867000-mm-3ob-jar-overlap.png, id=51, 361.35pt x 361.35pt>
File: ./images/zinc_01867000-mm-3ob-jar-overlap.png Graphic file (type png)
<use ./images/zinc_01867000-mm-3ob-jar-overlap.png>
Package pdftex.def Info: ./images/zinc_01867000-mm-3ob-jar-overlap.png  used on
 input line 360.
(pdftex.def)             Requested size: 211.38849pt x 211.38614pt.
<./images/zinc_03127671-mm-3ob-fep-overlap.png, id=52, 361.35pt x 361.35pt>
File: ./images/zinc_03127671-mm-3ob-fep-overlap.png Graphic file (type png)
<use ./images/zinc_03127671-mm-3ob-fep-overlap.png>
Package pdftex.def Info: ./images/zinc_03127671-mm-3ob-fep-overlap.png  used on
 input line 373.
(pdftex.def)             Requested size: 211.38849pt x 211.38614pt.
<./images/zinc_03127671-mm-3ob-jar-overlap.png, id=53, 361.35pt x 361.35pt>
File: ./images/zinc_03127671-mm-3ob-jar-overlap.png Graphic file (type png)
<use ./images/zinc_03127671-mm-3ob-jar-overlap.png>
Package pdftex.def Info: ./images/zinc_03127671-mm-3ob-jar-overlap.png  used on
 input line 377.
(pdftex.def)             Requested size: 211.38849pt x 211.38614pt.
<./images/zinc_04344392-mm-3ob-fep-overlap.png, id=54, 361.35pt x 361.35pt>
File: ./images/zinc_04344392-mm-3ob-fep-overlap.png Graphic file (type png)
<use ./images/zinc_04344392-mm-3ob-fep-overlap.png>
Package pdftex.def Info: ./images/zinc_04344392-mm-3ob-fep-overlap.png  used on
 input line 390.
(pdftex.def)             Requested size: 211.38849pt x 211.38614pt.
<./images/zinc_04344392-mm-3ob-jar-overlap.png, id=55, 361.35pt x 361.35pt>
File: ./images/zinc_04344392-mm-3ob-jar-overlap.png Graphic file (type png)
<use ./images/zinc_04344392-mm-3ob-jar-overlap.png>
Package pdftex.def Info: ./images/zinc_04344392-mm-3ob-jar-overlap.png  used on
 input line 394.
(pdftex.def)             Requested size: 211.38849pt x 211.38614pt.
<./images/zinc_04363792-mm-3ob-fep-overlap.png, id=56, 361.35pt x 361.35pt>
File: ./images/zinc_04363792-mm-3ob-fep-overlap.png Graphic file (type png)
<use ./images/zinc_04363792-mm-3ob-fep-overlap.png>
Package pdftex.def Info: ./images/zinc_04363792-mm-3ob-fep-overlap.png  used on
 input line 407.
(pdftex.def)             Requested size: 211.38849pt x 211.38614pt.
<./images/zinc_04363792-mm-3ob-jar-overlap.png, id=57, 361.35pt x 361.35pt>
File: ./images/zinc_04363792-mm-3ob-jar-overlap.png Graphic file (type png)
<use ./images/zinc_04363792-mm-3ob-jar-overlap.png>
Package pdftex.def Info: ./images/zinc_04363792-mm-3ob-jar-overlap.png  used on
 input line 411.
(pdftex.def)             Requested size: 211.38849pt x 211.38614pt.
<./images/zinc_06568023-mm-3ob-fep-overlap.png, id=58, 361.35pt x 361.35pt>
File: ./images/zinc_06568023-mm-3ob-fep-overlap.png Graphic file (type png)
<use ./images/zinc_06568023-mm-3ob-fep-overlap.png>
Package pdftex.def Info: ./images/zinc_06568023-mm-3ob-fep-overlap.png  used on
 input line 424.
(pdftex.def)             Requested size: 211.38849pt x 211.38614pt.
<./images/zinc_06568023-mm-3ob-jar-overlap.png, id=59, 361.35pt x 361.35pt>
File: ./images/zinc_06568023-mm-3ob-jar-overlap.png Graphic file (type png)
<use ./images/zinc_06568023-mm-3ob-jar-overlap.png>
Package pdftex.def Info: ./images/zinc_06568023-mm-3ob-jar-overlap.png  used on
 input line 428.
(pdftex.def)             Requested size: 211.38849pt x 211.38614pt.
<./images/zinc_33381936-mm-3ob-fep-overlap.png, id=60, 361.35pt x 361.35pt>
File: ./images/zinc_33381936-mm-3ob-fep-overlap.png Graphic file (type png)
<use ./images/zinc_33381936-mm-3ob-fep-overlap.png>
Package pdftex.def Info: ./images/zinc_33381936-mm-3ob-fep-overlap.png  used on
 input line 441.
(pdftex.def)             Requested size: 211.38849pt x 211.38614pt.
<./images/zinc_33381936-mm-3ob-jar-overlap.png, id=61, 361.35pt x 361.35pt>
File: ./images/zinc_33381936-mm-3ob-jar-overlap.png Graphic file (type png)
<use ./images/zinc_33381936-mm-3ob-jar-overlap.png>
Package pdftex.def Info: ./images/zinc_33381936-mm-3ob-jar-overlap.png  used on
 input line 445.
(pdftex.def)             Requested size: 211.38849pt x 211.38614pt.
<./images/zinc_00061095-mm-3ob-subplots-dihe-chi1.png, id=62, 462.528pt x 346.8
96pt>
File: ./images/zinc_00061095-mm-3ob-subplots-dihe-chi1.png Graphic file (type p
ng)
<use ./images/zinc_00061095-mm-3ob-subplots-dihe-chi1.png>
Package pdftex.def Info: ./images/zinc_00061095-mm-3ob-subplots-dihe-chi1.png  
used on input line 459.
(pdftex.def)             Requested size: 211.38849pt x 158.54192pt.
<./images/zinc_00061095-mm-3ob-subplots-dihe-chi2.png, id=63, 462.528pt x 346.8
96pt>
File: ./images/zinc_00061095-mm-3ob-subplots-dihe-chi2.png Graphic file (type p
ng)
<use ./images/zinc_00061095-mm-3ob-subplots-dihe-chi2.png>
Package pdftex.def Info: ./images/zinc_00061095-mm-3ob-subplots-dihe-chi2.png  
used on input line 463.
(pdftex.def)             Requested size: 211.38849pt x 158.54192pt.
<./images/zinc_00061095-mm-3ob-subplots-dihe-chi3.png, id=64, 462.528pt x 346.8
96pt>
File: ./images/zinc_00061095-mm-3ob-subplots-dihe-chi3.png Graphic file (type p
ng)
<use ./images/zinc_00061095-mm-3ob-subplots-dihe-chi3.png>
Package pdftex.def Info: ./images/zinc_00061095-mm-3ob-subplots-dihe-chi3.png  
used on input line 467.
(pdftex.def)             Requested size: 211.38849pt x 158.54192pt.
<./images/zinc_00061095-mm-3ob-subplots-dihe-chi4.png, id=65, 462.528pt x 346.8
96pt>
File: ./images/zinc_00061095-mm-3ob-subplots-dihe-chi4.png Graphic file (type p
ng)
<use ./images/zinc_00061095-mm-3ob-subplots-dihe-chi4.png>
Package pdftex.def Info: ./images/zinc_00061095-mm-3ob-subplots-dihe-chi4.png  
used on input line 471.
(pdftex.def)             Requested size: 211.38849pt x 158.54192pt.
<./images/zinc_00077329-mm-3ob-subplots-dihe-chi1.png, id=66, 462.528pt x 346.8
96pt>
File: ./images/zinc_00077329-mm-3ob-subplots-dihe-chi1.png Graphic file (type p
ng)
<use ./images/zinc_00077329-mm-3ob-subplots-dihe-chi1.png>
Package pdftex.def Info: ./images/zinc_00077329-mm-3ob-subplots-dihe-chi1.png  
used on input line 481.
(pdftex.def)             Requested size: 211.38849pt x 158.54192pt.
<./images/zinc_00079729-mm-3ob-subplots-dihe-chi1.png, id=67, 462.528pt x 346.8
96pt>
File: ./images/zinc_00079729-mm-3ob-subplots-dihe-chi1.png Graphic file (type p
ng)
<use ./images/zinc_00079729-mm-3ob-subplots-dihe-chi1.png>
Package pdftex.def Info: ./images/zinc_00079729-mm-3ob-subplots-dihe-chi1.png  
used on input line 491.
(pdftex.def)             Requested size: 211.38849pt x 158.54192pt.
<./images/zinc_00087557-mm-3ob-subplots-dihe-chi1.png, id=68, 462.528pt x 346.8
96pt>
File: ./images/zinc_00087557-mm-3ob-subplots-dihe-chi1.png Graphic file (type p
ng)
<use ./images/zinc_00087557-mm-3ob-subplots-dihe-chi1.png>
Package pdftex.def Info: ./images/zinc_00087557-mm-3ob-subplots-dihe-chi1.png  
used on input line 501.
(pdftex.def)             Requested size: 211.38849pt x 158.54192pt.
<./images/zinc_00087557-mm-3ob-subplots-dihe-chi2.png, id=69, 462.528pt x 346.8
96pt>
File: ./images/zinc_00087557-mm-3ob-subplots-dihe-chi2.png Graphic file (type p
ng)
<use ./images/zinc_00087557-mm-3ob-subplots-dihe-chi2.png>
Package pdftex.def Info: ./images/zinc_00087557-mm-3ob-subplots-dihe-chi2.png  
used on input line 505.
(pdftex.def)             Requested size: 211.38849pt x 158.54192pt.
<./images/zinc_00087557-mm-3ob-subplots-dihe-chi3.png, id=70, 462.528pt x 346.8
96pt>
File: ./images/zinc_00087557-mm-3ob-subplots-dihe-chi3.png Graphic file (type p
ng)
<use ./images/zinc_00087557-mm-3ob-subplots-dihe-chi3.png>
Package pdftex.def Info: ./images/zinc_00087557-mm-3ob-subplots-dihe-chi3.png  
used on input line 509.
(pdftex.def)             Requested size: 211.38849pt x 158.54192pt.
<./images/zinc_00087557-mm-3ob-subplots-dihe-chi4.png, id=71, 462.528pt x 346.8
96pt>
File: ./images/zinc_00087557-mm-3ob-subplots-dihe-chi4.png Graphic file (type p
ng)
<use ./images/zinc_00087557-mm-3ob-subplots-dihe-chi4.png>
Package pdftex.def Info: ./images/zinc_00087557-mm-3ob-subplots-dihe-chi4.png  
used on input line 513.
(pdftex.def)             Requested size: 211.38849pt x 158.54192pt.
<./images/zinc_00087557-mm-3ob-subplots-dihe-chi5.png, id=72, 462.528pt x 346.8
96pt>
File: ./images/zinc_00087557-mm-3ob-subplots-dihe-chi5.png Graphic file (type p
ng)
<use ./images/zinc_00087557-mm-3ob-subplots-dihe-chi5.png>
Package pdftex.def Info: ./images/zinc_00087557-mm-3ob-subplots-dihe-chi5.png  
used on input line 517.
(pdftex.def)             Requested size: 211.38849pt x 158.54192pt.
<./images/zinc_00095858-mm-3ob-subplots-dihe-chi1.png, id=73, 462.528pt x 346.8
96pt>
File: ./images/zinc_00095858-mm-3ob-subplots-dihe-chi1.png Graphic file (type p
ng)
<use ./images/zinc_00095858-mm-3ob-subplots-dihe-chi1.png>
Package pdftex.def Info: ./images/zinc_00095858-mm-3ob-subplots-dihe-chi1.png  
used on input line 527.
(pdftex.def)             Requested size: 211.38849pt x 158.54192pt.
<./images/zinc_00095858-mm-3ob-subplots-dihe-chi2.png, id=74, 462.528pt x 346.8
96pt>
File: ./images/zinc_00095858-mm-3ob-subplots-dihe-chi2.png Graphic file (type p
ng)
<use ./images/zinc_00095858-mm-3ob-subplots-dihe-chi2.png>
Package pdftex.def Info: ./images/zinc_00095858-mm-3ob-subplots-dihe-chi2.png  
used on input line 531.
(pdftex.def)             Requested size: 211.38849pt x 158.54192pt.
<./images/zinc_00095858-mm-3ob-subplots-dihe-chi3.png, id=75, 462.528pt x 346.8
96pt>
File: ./images/zinc_00095858-mm-3ob-subplots-dihe-chi3.png Graphic file (type p
ng)
<use ./images/zinc_00095858-mm-3ob-subplots-dihe-chi3.png>
Package pdftex.def Info: ./images/zinc_00095858-mm-3ob-subplots-dihe-chi3.png  
used on input line 535.
(pdftex.def)             Requested size: 211.38849pt x 158.54192pt.
<./images/zinc_00095858-mm-3ob-subplots-dihe-chi4.png, id=76, 462.528pt x 346.8
96pt>
File: ./images/zinc_00095858-mm-3ob-subplots-dihe-chi4.png Graphic file (type p
ng)
<use ./images/zinc_00095858-mm-3ob-subplots-dihe-chi4.png>
Package pdftex.def Info: ./images/zinc_00095858-mm-3ob-subplots-dihe-chi4.png  
used on input line 539.
(pdftex.def)             Requested size: 211.38849pt x 158.54192pt.
<./images/zinc_00107550-mm-3ob-subplots-dihe-chi1.png, id=77, 462.528pt x 346.8
96pt>
File: ./images/zinc_00107550-mm-3ob-subplots-dihe-chi1.png Graphic file (type p
ng)
<use ./images/zinc_00107550-mm-3ob-subplots-dihe-chi1.png>
Package pdftex.def Info: ./images/zinc_00107550-mm-3ob-subplots-dihe-chi1.png  
used on input line 548.
(pdftex.def)             Requested size: 211.38849pt x 158.54192pt.
<./images/zinc_00107550-mm-3ob-subplots-dihe-chi2.png, id=78, 462.528pt x 346.8
96pt>
File: ./images/zinc_00107550-mm-3ob-subplots-dihe-chi2.png Graphic file (type p
ng)
<use ./images/zinc_00107550-mm-3ob-subplots-dihe-chi2.png>
Package pdftex.def Info: ./images/zinc_00107550-mm-3ob-subplots-dihe-chi2.png  
used on input line 552.
(pdftex.def)             Requested size: 211.38849pt x 158.54192pt.
<./images/zinc_00107550-mm-3ob-subplots-dihe-chi3.png, id=79, 462.528pt x 346.8
96pt>
File: ./images/zinc_00107550-mm-3ob-subplots-dihe-chi3.png Graphic file (type p
ng)
<use ./images/zinc_00107550-mm-3ob-subplots-dihe-chi3.png>
Package pdftex.def Info: ./images/zinc_00107550-mm-3ob-subplots-dihe-chi3.png  
used on input line 556.
(pdftex.def)             Requested size: 211.38849pt x 158.54192pt.
<./images/zinc_00107778-mm-3ob-subplots-dihe-chi1.png, id=80, 462.528pt x 346.8
96pt>
File: ./images/zinc_00107778-mm-3ob-subplots-dihe-chi1.png Graphic file (type p
ng)
<use ./images/zinc_00107778-mm-3ob-subplots-dihe-chi1.png>
Package pdftex.def Info: ./images/zinc_00107778-mm-3ob-subplots-dihe-chi1.png  
used on input line 566.
(pdftex.def)             Requested size: 211.38849pt x 158.54192pt.
<./images/zinc_00107778-mm-3ob-subplots-dihe-chi2.png, id=81, 462.528pt x 346.8
96pt>
File: ./images/zinc_00107778-mm-3ob-subplots-dihe-chi2.png Graphic file (type p
ng)
<use ./images/zinc_00107778-mm-3ob-subplots-dihe-chi2.png>
Package pdftex.def Info: ./images/zinc_00107778-mm-3ob-subplots-dihe-chi2.png  
used on input line 570.
(pdftex.def)             Requested size: 211.38849pt x 158.54192pt.
<./images/zinc_00123162-mm-3ob-subplots-dihe-chi1.png, id=82, 462.528pt x 346.8
96pt>
File: ./images/zinc_00123162-mm-3ob-subplots-dihe-chi1.png Graphic file (type p
ng)
<use ./images/zinc_00123162-mm-3ob-subplots-dihe-chi1.png>
Package pdftex.def Info: ./images/zinc_00123162-mm-3ob-subplots-dihe-chi1.png  
used on input line 579.
(pdftex.def)             Requested size: 211.38849pt x 158.54192pt.
<./images/zinc_00123162-mm-3ob-subplots-dihe-chi2.png, id=83, 462.528pt x 346.8
96pt>
File: ./images/zinc_00123162-mm-3ob-subplots-dihe-chi2.png Graphic file (type p
ng)
<use ./images/zinc_00123162-mm-3ob-subplots-dihe-chi2.png>
Package pdftex.def Info: ./images/zinc_00123162-mm-3ob-subplots-dihe-chi2.png  
used on input line 583.
(pdftex.def)             Requested size: 211.38849pt x 158.54192pt.
<./images/zinc_00123162-mm-3ob-subplots-dihe-chi3.png, id=84, 462.528pt x 346.8
96pt>
File: ./images/zinc_00123162-mm-3ob-subplots-dihe-chi3.png Graphic file (type p
ng)
<use ./images/zinc_00123162-mm-3ob-subplots-dihe-chi3.png>
Package pdftex.def Info: ./images/zinc_00123162-mm-3ob-subplots-dihe-chi3.png  
used on input line 587.
(pdftex.def)             Requested size: 211.38849pt x 158.54192pt.
<./images/zinc_00123162-mm-3ob-subplots-dihe-chi4.png, id=85, 462.528pt x 346.8
96pt>
File: ./images/zinc_00123162-mm-3ob-subplots-dihe-chi4.png Graphic file (type p
ng)
<use ./images/zinc_00123162-mm-3ob-subplots-dihe-chi4.png>
Package pdftex.def Info: ./images/zinc_00123162-mm-3ob-subplots-dihe-chi4.png  
used on input line 591.
(pdftex.def)             Requested size: 211.38849pt x 158.54192pt.
<./images/zinc_00123162-mm-3ob-subplots-dihe-chi5.png, id=86, 462.528pt x 346.8
96pt>
File: ./images/zinc_00123162-mm-3ob-subplots-dihe-chi5.png Graphic file (type p
ng)
<use ./images/zinc_00123162-mm-3ob-subplots-dihe-chi5.png>
Package pdftex.def Info: ./images/zinc_00123162-mm-3ob-subplots-dihe-chi5.png  
used on input line 595.
(pdftex.def)             Requested size: 211.38849pt x 158.54192pt.
<./images/zinc_00123162-mm-3ob-subplots-dihe-chi6.png, id=87, 462.528pt x 346.8
96pt>
File: ./images/zinc_00123162-mm-3ob-subplots-dihe-chi6.png Graphic file (type p
ng)
<use ./images/zinc_00123162-mm-3ob-subplots-dihe-chi6.png>
Package pdftex.def Info: ./images/zinc_00123162-mm-3ob-subplots-dihe-chi6.png  
used on input line 599.
(pdftex.def)             Requested size: 211.38849pt x 158.54192pt.
<./images/zinc_00133435-mm-3ob-subplots-dihe-chi1.png, id=88, 462.528pt x 346.8
96pt>
File: ./images/zinc_00133435-mm-3ob-subplots-dihe-chi1.png Graphic file (type p
ng)
<use ./images/zinc_00133435-mm-3ob-subplots-dihe-chi1.png>
Package pdftex.def Info: ./images/zinc_00133435-mm-3ob-subplots-dihe-chi1.png  
used on input line 609.
(pdftex.def)             Requested size: 211.38849pt x 158.54192pt.
<./images/zinc_00133435-mm-3ob-subplots-dihe-chi2.png, id=89, 462.528pt x 346.8
96pt>
File: ./images/zinc_00133435-mm-3ob-subplots-dihe-chi2.png Graphic file (type p
ng)
<use ./images/zinc_00133435-mm-3ob-subplots-dihe-chi2.png>
Package pdftex.def Info: ./images/zinc_00133435-mm-3ob-subplots-dihe-chi2.png  
used on input line 613.
(pdftex.def)             Requested size: 211.38849pt x 158.54192pt.
<./images/zinc_00138607-mm-3ob-subplots-dihe-chi1.png, id=90, 462.528pt x 346.8
96pt>
File: ./images/zinc_00138607-mm-3ob-subplots-dihe-chi1.png Graphic file (type p
ng)
<use ./images/zinc_00138607-mm-3ob-subplots-dihe-chi1.png>
Package pdftex.def Info: ./images/zinc_00138607-mm-3ob-subplots-dihe-chi1.png  
used on input line 623.
(pdftex.def)             Requested size: 211.38849pt x 158.54192pt.
<./images/zinc_00138607-mm-3ob-subplots-dihe-chi2.png, id=91, 462.528pt x 346.8
96pt>
File: ./images/zinc_00138607-mm-3ob-subplots-dihe-chi2.png Graphic file (type p
ng)
<use ./images/zinc_00138607-mm-3ob-subplots-dihe-chi2.png>
Package pdftex.def Info: ./images/zinc_00138607-mm-3ob-subplots-dihe-chi2.png  
used on input line 627.
(pdftex.def)             Requested size: 211.38849pt x 158.54192pt.
<./images/zinc_00138607-mm-3ob-subplots-dihe-chi3.png, id=92, 462.528pt x 346.8
96pt>
File: ./images/zinc_00138607-mm-3ob-subplots-dihe-chi3.png Graphic file (type p
ng)
<use ./images/zinc_00138607-mm-3ob-subplots-dihe-chi3.png>
Package pdftex.def Info: ./images/zinc_00138607-mm-3ob-subplots-dihe-chi3.png  
used on input line 631.
(pdftex.def)             Requested size: 211.38849pt x 158.54192pt.
<./images/zinc_00164361-mm-3ob-subplots-dihe-chi1.png, id=93, 462.528pt x 346.8
96pt>
File: ./images/zinc_00164361-mm-3ob-subplots-dihe-chi1.png Graphic file (type p
ng)
<use ./images/zinc_00164361-mm-3ob-subplots-dihe-chi1.png>
Package pdftex.def Info: ./images/zinc_00164361-mm-3ob-subplots-dihe-chi1.png  
used on input line 640.
(pdftex.def)             Requested size: 211.38849pt x 158.54192pt.
<./images/zinc_00167648-mm-3ob-subplots-dihe-chi1.png, id=94, 462.528pt x 346.8
96pt>
File: ./images/zinc_00167648-mm-3ob-subplots-dihe-chi1.png Graphic file (type p
ng)
<use ./images/zinc_00167648-mm-3ob-subplots-dihe-chi1.png>
Package pdftex.def Info: ./images/zinc_00167648-mm-3ob-subplots-dihe-chi1.png  
used on input line 649.
(pdftex.def)             Requested size: 211.38849pt x 158.54192pt.
<./images/zinc_00167648-mm-3ob-subplots-dihe-chi2.png, id=95, 462.528pt x 346.8
96pt>
File: ./images/zinc_00167648-mm-3ob-subplots-dihe-chi2.png Graphic file (type p
ng)
<use ./images/zinc_00167648-mm-3ob-subplots-dihe-chi2.png>
Package pdftex.def Info: ./images/zinc_00167648-mm-3ob-subplots-dihe-chi2.png  
used on input line 653.
(pdftex.def)             Requested size: 211.38849pt x 158.54192pt.
<./images/zinc_00167648-mm-3ob-subplots-dihe-chi3.png, id=96, 462.528pt x 346.8
96pt>
File: ./images/zinc_00167648-mm-3ob-subplots-dihe-chi3.png Graphic file (type p
ng)
<use ./images/zinc_00167648-mm-3ob-subplots-dihe-chi3.png>
Package pdftex.def Info: ./images/zinc_00167648-mm-3ob-subplots-dihe-chi3.png  
used on input line 657.
(pdftex.def)             Requested size: 211.38849pt x 158.54192pt.
<./images/zinc_01755198-mm-3ob-subplots-dihe-chi1.png, id=97, 462.528pt x 346.8
96pt>
File: ./images/zinc_01755198-mm-3ob-subplots-dihe-chi1.png Graphic file (type p
ng)
<use ./images/zinc_01755198-mm-3ob-subplots-dihe-chi1.png>
Package pdftex.def Info: ./images/zinc_01755198-mm-3ob-subplots-dihe-chi1.png  
used on input line 666.
(pdftex.def)             Requested size: 211.38849pt x 158.54192pt.
<./images/zinc_01755198-mm-3ob-subplots-dihe-chi2.png, id=98, 462.528pt x 346.8
96pt>
File: ./images/zinc_01755198-mm-3ob-subplots-dihe-chi2.png Graphic file (type p
ng)
<use ./images/zinc_01755198-mm-3ob-subplots-dihe-chi2.png>
Package pdftex.def Info: ./images/zinc_01755198-mm-3ob-subplots-dihe-chi2.png  
used on input line 670.
(pdftex.def)             Requested size: 211.38849pt x 158.54192pt.
<./images/zinc_01755198-mm-3ob-subplots-dihe-chi3.png, id=99, 462.528pt x 346.8
96pt>
File: ./images/zinc_01755198-mm-3ob-subplots-dihe-chi3.png Graphic file (type p
ng)
<use ./images/zinc_01755198-mm-3ob-subplots-dihe-chi3.png>
Package pdftex.def Info: ./images/zinc_01755198-mm-3ob-subplots-dihe-chi3.png  
used on input line 674.
(pdftex.def)             Requested size: 211.38849pt x 158.54192pt.
<./images/zinc_01755198-mm-3ob-subplots-dihe-chi4.png, id=100, 462.528pt x 346.
896pt>
File: ./images/zinc_01755198-mm-3ob-subplots-dihe-chi4.png Graphic file (type p
ng)
<use ./images/zinc_01755198-mm-3ob-subplots-dihe-chi4.png>
Package pdftex.def Info: ./images/zinc_01755198-mm-3ob-subplots-dihe-chi4.png  
used on input line 678.
(pdftex.def)             Requested size: 211.38849pt x 158.54192pt.
<./images/zinc_01755198-mm-3ob-subplots-dihe-chi5.png, id=101, 462.528pt x 346.
896pt>
File: ./images/zinc_01755198-mm-3ob-subplots-dihe-chi5.png Graphic file (type p
ng)
<use ./images/zinc_01755198-mm-3ob-subplots-dihe-chi5.png>
Package pdftex.def Info: ./images/zinc_01755198-mm-3ob-subplots-dihe-chi5.png  
used on input line 682.
(pdftex.def)             Requested size: 211.38849pt x 158.54192pt.
<./images/zinc_01867000-mm-3ob-subplots-dihe-chi1.png, id=102, 462.528pt x 346.
896pt>
File: ./images/zinc_01867000-mm-3ob-subplots-dihe-chi1.png Graphic file (type p
ng)
<use ./images/zinc_01867000-mm-3ob-subplots-dihe-chi1.png>
Package pdftex.def Info: ./images/zinc_01867000-mm-3ob-subplots-dihe-chi1.png  
used on input line 691.
(pdftex.def)             Requested size: 211.38849pt x 158.54192pt.
<./images/zinc_01867000-mm-3ob-subplots-dihe-chi2.png, id=103, 462.528pt x 346.
896pt>
File: ./images/zinc_01867000-mm-3ob-subplots-dihe-chi2.png Graphic file (type p
ng)
<use ./images/zinc_01867000-mm-3ob-subplots-dihe-chi2.png>
Package pdftex.def Info: ./images/zinc_01867000-mm-3ob-subplots-dihe-chi2.png  
used on input line 695.
(pdftex.def)             Requested size: 211.38849pt x 158.54192pt.
<./images/zinc_03127671-mm-3ob-subplots-dihe-chi1.png, id=104, 462.528pt x 346.
896pt>
File: ./images/zinc_03127671-mm-3ob-subplots-dihe-chi1.png Graphic file (type p
ng)
<use ./images/zinc_03127671-mm-3ob-subplots-dihe-chi1.png>
Package pdftex.def Info: ./images/zinc_03127671-mm-3ob-subplots-dihe-chi1.png  
used on input line 704.
(pdftex.def)             Requested size: 140.92804pt x 105.69461pt.
<./images/zinc_03127671-mm-3ob-subplots-dihe-chi2.png, id=105, 462.528pt x 346.
896pt>
File: ./images/zinc_03127671-mm-3ob-subplots-dihe-chi2.png Graphic file (type p
ng)
<use ./images/zinc_03127671-mm-3ob-subplots-dihe-chi2.png>
Package pdftex.def Info: ./images/zinc_03127671-mm-3ob-subplots-dihe-chi2.png  
used on input line 708.
(pdftex.def)             Requested size: 140.92804pt x 105.69461pt.
<./images/zinc_03127671-mm-3ob-subplots-dihe-chi3.png, id=106, 462.528pt x 346.
896pt>
File: ./images/zinc_03127671-mm-3ob-subplots-dihe-chi3.png Graphic file (type p
ng)
<use ./images/zinc_03127671-mm-3ob-subplots-dihe-chi3.png>
Package pdftex.def Info: ./images/zinc_03127671-mm-3ob-subplots-dihe-chi3.png  
used on input line 712.
(pdftex.def)             Requested size: 140.92804pt x 105.69461pt.
<./images/zinc_03127671-mm-3ob-subplots-dihe-chi4.png, id=107, 462.528pt x 346.
896pt>
File: ./images/zinc_03127671-mm-3ob-subplots-dihe-chi4.png Graphic file (type p
ng)
<use ./images/zinc_03127671-mm-3ob-subplots-dihe-chi4.png>
Package pdftex.def Info: ./images/zinc_03127671-mm-3ob-subplots-dihe-chi4.png  
used on input line 716.
(pdftex.def)             Requested size: 140.92804pt x 105.69461pt.
<./images/zinc_03127671-mm-3ob-subplots-dihe-chi5.png, id=108, 462.528pt x 346.
896pt>
File: ./images/zinc_03127671-mm-3ob-subplots-dihe-chi5.png Graphic file (type p
ng)
<use ./images/zinc_03127671-mm-3ob-subplots-dihe-chi5.png>
Package pdftex.def Info: ./images/zinc_03127671-mm-3ob-subplots-dihe-chi5.png  
used on input line 720.
(pdftex.def)             Requested size: 140.92804pt x 105.69461pt.
<./images/zinc_03127671-mm-3ob-subplots-dihe-chi6.png, id=109, 462.528pt x 346.
896pt>
File: ./images/zinc_03127671-mm-3ob-subplots-dihe-chi6.png Graphic file (type p
ng)
<use ./images/zinc_03127671-mm-3ob-subplots-dihe-chi6.png>
Package pdftex.def Info: ./images/zinc_03127671-mm-3ob-subplots-dihe-chi6.png  
used on input line 724.
(pdftex.def)             Requested size: 140.92804pt x 105.69461pt.
<./images/zinc_03127671-mm-3ob-subplots-dihe-chi7.png, id=110, 462.528pt x 346.
896pt>
File: ./images/zinc_03127671-mm-3ob-subplots-dihe-chi7.png Graphic file (type p
ng)
<use ./images/zinc_03127671-mm-3ob-subplots-dihe-chi7.png>
Package pdftex.def Info: ./images/zinc_03127671-mm-3ob-subplots-dihe-chi7.png  
used on input line 728.
(pdftex.def)             Requested size: 140.92804pt x 105.69461pt.
<./images/zinc_03127671-mm-3ob-subplots-dihe-chi8.png, id=111, 462.528pt x 346.
896pt>
File: ./images/zinc_03127671-mm-3ob-subplots-dihe-chi8.png Graphic file (type p
ng)
<use ./images/zinc_03127671-mm-3ob-subplots-dihe-chi8.png>
Package pdftex.def Info: ./images/zinc_03127671-mm-3ob-subplots-dihe-chi8.png  
used on input line 732.
(pdftex.def)             Requested size: 140.92804pt x 105.69461pt.
<./images/zinc_03127671-mm-3ob-subplots-dihe-chi9.png, id=112, 462.528pt x 346.
896pt>
File: ./images/zinc_03127671-mm-3ob-subplots-dihe-chi9.png Graphic file (type p
ng)
<use ./images/zinc_03127671-mm-3ob-subplots-dihe-chi9.png>
Package pdftex.def Info: ./images/zinc_03127671-mm-3ob-subplots-dihe-chi9.png  
used on input line 736.
(pdftex.def)             Requested size: 140.92804pt x 105.69461pt.
<./images/zinc_03127671-mm-3ob-subplots-dihe-chi10.png, id=113, 462.528pt x 346
.896pt>
File: ./images/zinc_03127671-mm-3ob-subplots-dihe-chi10.png Graphic file (type 
png)
<use ./images/zinc_03127671-mm-3ob-subplots-dihe-chi10.png>
Package pdftex.def Info: ./images/zinc_03127671-mm-3ob-subplots-dihe-chi10.png 
 used on input line 740.
(pdftex.def)             Requested size: 140.92804pt x 105.69461pt.
<./images/zinc_04344392-mm-3ob-subplots-dihe-chi1.png, id=114, 462.528pt x 346.
896pt>
File: ./images/zinc_04344392-mm-3ob-subplots-dihe-chi1.png Graphic file (type p
ng)
<use ./images/zinc_04344392-mm-3ob-subplots-dihe-chi1.png>
Package pdftex.def Info: ./images/zinc_04344392-mm-3ob-subplots-dihe-chi1.png  
used on input line 749.
(pdftex.def)             Requested size: 140.92804pt x 105.69461pt.
<./images/zinc_04344392-mm-3ob-subplots-dihe-chi2.png, id=115, 462.528pt x 346.
896pt>
File: ./images/zinc_04344392-mm-3ob-subplots-dihe-chi2.png Graphic file (type p
ng)
<use ./images/zinc_04344392-mm-3ob-subplots-dihe-chi2.png>
Package pdftex.def Info: ./images/zinc_04344392-mm-3ob-subplots-dihe-chi2.png  
used on input line 753.
(pdftex.def)             Requested size: 140.92804pt x 105.69461pt.
<./images/zinc_04344392-mm-3ob-subplots-dihe-chi3.png, id=116, 462.528pt x 346.
896pt>
File: ./images/zinc_04344392-mm-3ob-subplots-dihe-chi3.png Graphic file (type p
ng)
<use ./images/zinc_04344392-mm-3ob-subplots-dihe-chi3.png>
Package pdftex.def Info: ./images/zinc_04344392-mm-3ob-subplots-dihe-chi3.png  
used on input line 757.
(pdftex.def)             Requested size: 140.92804pt x 105.69461pt.
<./images/zinc_04344392-mm-3ob-subplots-dihe-chi4.png, id=117, 462.528pt x 346.
896pt>
File: ./images/zinc_04344392-mm-3ob-subplots-dihe-chi4.png Graphic file (type p
ng)
<use ./images/zinc_04344392-mm-3ob-subplots-dihe-chi4.png>
Package pdftex.def Info: ./images/zinc_04344392-mm-3ob-subplots-dihe-chi4.png  
used on input line 761.
(pdftex.def)             Requested size: 140.92804pt x 105.69461pt.
<./images/zinc_04344392-mm-3ob-subplots-dihe-chi5.png, id=118, 462.528pt x 346.
896pt>
File: ./images/zinc_04344392-mm-3ob-subplots-dihe-chi5.png Graphic file (type p
ng)
<use ./images/zinc_04344392-mm-3ob-subplots-dihe-chi5.png>
Package pdftex.def Info: ./images/zinc_04344392-mm-3ob-subplots-dihe-chi5.png  
used on input line 765.
(pdftex.def)             Requested size: 140.92804pt x 105.69461pt.
<./images/zinc_04344392-mm-3ob-subplots-dihe-chi6.png, id=119, 462.528pt x 346.
896pt>
File: ./images/zinc_04344392-mm-3ob-subplots-dihe-chi6.png Graphic file (type p
ng)
<use ./images/zinc_04344392-mm-3ob-subplots-dihe-chi6.png>
Package pdftex.def Info: ./images/zinc_04344392-mm-3ob-subplots-dihe-chi6.png  
used on input line 769.
(pdftex.def)             Requested size: 140.92804pt x 105.69461pt.
<./images/zinc_04344392-mm-3ob-subplots-dihe-chi7.png, id=120, 462.528pt x 346.
896pt>
File: ./images/zinc_04344392-mm-3ob-subplots-dihe-chi7.png Graphic file (type p
ng)
<use ./images/zinc_04344392-mm-3ob-subplots-dihe-chi7.png>
Package pdftex.def Info: ./images/zinc_04344392-mm-3ob-subplots-dihe-chi7.png  
used on input line 773.
(pdftex.def)             Requested size: 140.92804pt x 105.69461pt.
<./images/zinc_04344392-mm-3ob-subplots-dihe-chi8.png, id=121, 462.528pt x 346.
896pt>
File: ./images/zinc_04344392-mm-3ob-subplots-dihe-chi8.png Graphic file (type p
ng)
<use ./images/zinc_04344392-mm-3ob-subplots-dihe-chi8.png>
Package pdftex.def Info: ./images/zinc_04344392-mm-3ob-subplots-dihe-chi8.png  
used on input line 777.
(pdftex.def)             Requested size: 140.92804pt x 105.69461pt.
<./images/zinc_04344392-mm-3ob-subplots-dihe-chi9.png, id=122, 462.528pt x 346.
896pt>
File: ./images/zinc_04344392-mm-3ob-subplots-dihe-chi9.png Graphic file (type p
ng)
<use ./images/zinc_04344392-mm-3ob-subplots-dihe-chi9.png>
Package pdftex.def Info: ./images/zinc_04344392-mm-3ob-subplots-dihe-chi9.png  
used on input line 781.
(pdftex.def)             Requested size: 140.92804pt x 105.69461pt.
<./images/zinc_04344392-mm-3ob-subplots-dihe-chi10.png, id=123, 462.528pt x 346
.896pt>
File: ./images/zinc_04344392-mm-3ob-subplots-dihe-chi10.png Graphic file (type 
png)
<use ./images/zinc_04344392-mm-3ob-subplots-dihe-chi10.png>
Package pdftex.def Info: ./images/zinc_04344392-mm-3ob-subplots-dihe-chi10.png 
 used on input line 785.
(pdftex.def)             Requested size: 140.92804pt x 105.69461pt.
<./images/zinc_04363792-mm-3ob-subplots-dihe-chi1.png, id=124, 462.528pt x 346.
896pt>
File: ./images/zinc_04363792-mm-3ob-subplots-dihe-chi1.png Graphic file (type p
ng)
<use ./images/zinc_04363792-mm-3ob-subplots-dihe-chi1.png>
Package pdftex.def Info: ./images/zinc_04363792-mm-3ob-subplots-dihe-chi1.png  
used on input line 794.
(pdftex.def)             Requested size: 211.38849pt x 158.54192pt.
<./images/zinc_04363792-mm-3ob-subplots-dihe-chi2.png, id=125, 462.528pt x 346.
896pt>
File: ./images/zinc_04363792-mm-3ob-subplots-dihe-chi2.png Graphic file (type p
ng)
<use ./images/zinc_04363792-mm-3ob-subplots-dihe-chi2.png>
Package pdftex.def Info: ./images/zinc_04363792-mm-3ob-subplots-dihe-chi2.png  
used on input line 798.
(pdftex.def)             Requested size: 211.38849pt x 158.54192pt.
<./images/zinc_06568023-mm-3ob-subplots-dihe-chi1.png, id=126, 462.528pt x 346.
896pt>
File: ./images/zinc_06568023-mm-3ob-subplots-dihe-chi1.png Graphic file (type p
ng)
<use ./images/zinc_06568023-mm-3ob-subplots-dihe-chi1.png>
Package pdftex.def Info: ./images/zinc_06568023-mm-3ob-subplots-dihe-chi1.png  
used on input line 807.
(pdftex.def)             Requested size: 211.38849pt x 158.54192pt.
<./images/zinc_06568023-mm-3ob-subplots-dihe-chi2.png, id=127, 462.528pt x 346.
896pt>
File: ./images/zinc_06568023-mm-3ob-subplots-dihe-chi2.png Graphic file (type p
ng)
<use ./images/zinc_06568023-mm-3ob-subplots-dihe-chi2.png>
Package pdftex.def Info: ./images/zinc_06568023-mm-3ob-subplots-dihe-chi2.png  
used on input line 811.
(pdftex.def)             Requested size: 211.38849pt x 158.54192pt.
<./images/zinc_06568023-mm-3ob-subplots-dihe-chi3.png, id=128, 462.528pt x 346.
896pt>
File: ./images/zinc_06568023-mm-3ob-subplots-dihe-chi3.png Graphic file (type p
ng)
<use ./images/zinc_06568023-mm-3ob-subplots-dihe-chi3.png>
Package pdftex.def Info: ./images/zinc_06568023-mm-3ob-subplots-dihe-chi3.png  
used on input line 815.
(pdftex.def)             Requested size: 211.38849pt x 158.54192pt.
<./images/zinc_33381936-mm-3ob-subplots-dihe-chi1.png, id=129, 462.528pt x 346.
896pt>
File: ./images/zinc_33381936-mm-3ob-subplots-dihe-chi1.png Graphic file (type p
ng)
<use ./images/zinc_33381936-mm-3ob-subplots-dihe-chi1.png>
Package pdftex.def Info: ./images/zinc_33381936-mm-3ob-subplots-dihe-chi1.png  
used on input line 824.
(pdftex.def)             Requested size: 211.38849pt x 158.54192pt.
<./images/zinc_33381936-mm-3ob-subplots-dihe-chi2.png, id=130, 462.528pt x 346.
896pt>
File: ./images/zinc_33381936-mm-3ob-subplots-dihe-chi2.png Graphic file (type p
ng)
<use ./images/zinc_33381936-mm-3ob-subplots-dihe-chi2.png>
Package pdftex.def Info: ./images/zinc_33381936-mm-3ob-subplots-dihe-chi2.png  
used on input line 828.
(pdftex.def)             Requested size: 211.38849pt x 158.54192pt.
<./images/zinc_33381936-mm-3ob-subplots-dihe-chi3.png, id=131, 462.528pt x 346.
896pt>
File: ./images/zinc_33381936-mm-3ob-subplots-dihe-chi3.png Graphic file (type p
ng)
<use ./images/zinc_33381936-mm-3ob-subplots-dihe-chi3.png>
Package pdftex.def Info: ./images/zinc_33381936-mm-3ob-subplots-dihe-chi3.png  
used on input line 832.
(pdftex.def)             Requested size: 211.38849pt x 158.54192pt.
 [2

 <./images/hipen22-chemdraw-11x14-300dpi.png>] [3 <./images/zinc_00061095-mm-3o
b-fep-overlap.png> <./images/zinc_00061095-mm-3ob-jar-overlap.png> <./images/zi
nc_00077329-mm-3ob-fep-overlap.png> <./images/zinc_00077329-mm-3ob-jar-overlap.
png>] [4 <./images/zinc_00079729-mm-3ob-fep-overlap.png> <./images/zinc_0007972
9-mm-3ob-jar-overlap.png> <./images/zinc_00086442-mm-3ob-fep-overlap.png> <./im
ages/zinc_00086442-mm-3ob-jar-overlap.png>] [5 <./images/zinc_00087557-mm-3ob-f
ep-overlap.png> <./images/zinc_00087557-mm-3ob-jar-overlap.png> <./images/zinc_
00095858-mm-3ob-fep-overlap.png> <./images/zinc_00095858-mm-3ob-jar-overlap.png
>] [6 <./images/zinc_00107550-mm-3ob-fep-overlap.png> <./images/zinc_00107550-m
m-3ob-jar-overlap.png> <./images/zinc_00107778-mm-3ob-fep-overlap.png> <./image
s/zinc_00107778-mm-3ob-jar-overlap.png>]
[7 <./images/zinc_00123162-mm-3ob-fep-overlap.png> <./images/zinc_00123162-mm-3
ob-jar-overlap.png> <./images/zinc_00133435-mm-3ob-fep-overlap.png> <./images/z
inc_00133435-mm-3ob-jar-overlap.png>] [8 <./images/zinc_00138607-mm-3ob-fep-ove
rlap.png> <./images/zinc_00138607-mm-3ob-jar-overlap.png> <./images/zinc_001406
10-mm-3ob-fep-overlap.png> <./images/zinc_00140610-mm-3ob-jar-overlap.png>]
[9 <./images/zinc_00164361-mm-3ob-fep-overlap.png> <./images/zinc_00164361-mm-3
ob-jar-overlap.png> <./images/zinc_00167648-mm-3ob-fep-overlap.png> <./images/z
inc_00167648-mm-3ob-jar-overlap.png>] [10 <./images/zinc_00169358-mm-3ob-fep-ov
erlap.png> <./images/zinc_00169358-mm-3ob-jar-overlap.png> <./images/zinc_01755
198-mm-3ob-fep-overlap.png> <./images/zinc_01755198-mm-3ob-jar-overlap.png>]
[11 <./images/zinc_01867000-mm-3ob-fep-overlap.png> <./images/zinc_01867000-mm-
3ob-jar-overlap.png> <./images/zinc_03127671-mm-3ob-fep-overlap.png> <./images/
zinc_03127671-mm-3ob-jar-overlap.png>] [12 <./images/zinc_04344392-mm-3ob-fep-o
verlap.png> <./images/zinc_04344392-mm-3ob-jar-overlap.png> <./images/zinc_0436
3792-mm-3ob-fep-overlap.png> <./images/zinc_04363792-mm-3ob-jar-overlap.png>]
[13 <./images/zinc_06568023-mm-3ob-fep-overlap.png> <./images/zinc_06568023-mm-
3ob-jar-overlap.png> <./images/zinc_33381936-mm-3ob-fep-overlap.png> <./images/
zinc_33381936-mm-3ob-jar-overlap.png>] [14 <./images/zinc_00061095-mm-3ob-subpl
ots-dihe-chi1.png> <./images/zinc_00061095-mm-3ob-subplots-dihe-chi2.png> <./im
ages/zinc_00061095-mm-3ob-subplots-dihe-chi3.png> <./images/zinc_00061095-mm-3o
b-subplots-dihe-chi4.png> <./images/zinc_00077329-mm-3ob-subplots-dihe-chi1.png
>] [15 <./images/zinc_00079729-mm-3ob-subplots-dihe-chi1.png>] [16 <./images/zi
nc_00087557-mm-3ob-subplots-dihe-chi1.png> <./images/zinc_00087557-mm-3ob-subpl
ots-dihe-chi2.png> <./images/zinc_00087557-mm-3ob-subplots-dihe-chi3.png> <./im
ages/zinc_00087557-mm-3ob-subplots-dihe-chi4.png> <./images/zinc_00087557-mm-3o
b-subplots-dihe-chi5.png>] [17 <./images/zinc_00095858-mm-3ob-subplots-dihe-chi
1.png> <./images/zinc_00095858-mm-3ob-subplots-dihe-chi2.png> <./images/zinc_00
095858-mm-3ob-subplots-dihe-chi3.png> <./images/zinc_00095858-mm-3ob-subplots-d
ihe-chi4.png>] [18 <./images/zinc_00107550-mm-3ob-subplots-dihe-chi1.png> <./im
ages/zinc_00107550-mm-3ob-subplots-dihe-chi2.png> <./images/zinc_00107550-mm-3o
b-subplots-dihe-chi3.png> <./images/zinc_00107778-mm-3ob-subplots-dihe-chi1.png
> <./images/zinc_00107778-mm-3ob-subplots-dihe-chi2.png>] [19 <./images/zinc_00
123162-mm-3ob-subplots-dihe-chi1.png> <./images/zinc_00123162-mm-3ob-subplots-d
ihe-chi2.png> <./images/zinc_00123162-mm-3ob-subplots-dihe-chi3.png> <./images/
zinc_00123162-mm-3ob-subplots-dihe-chi4.png> <./images/zinc_00123162-mm-3ob-sub
plots-dihe-chi5.png> <./images/zinc_00123162-mm-3ob-subplots-dihe-chi6.png>]
[20 <./images/zinc_00133435-mm-3ob-subplots-dihe-chi1.png> <./images/zinc_00133
435-mm-3ob-subplots-dihe-chi2.png> <./images/zinc_00138607-mm-3ob-subplots-dihe
-chi1.png> <./images/zinc_00138607-mm-3ob-subplots-dihe-chi2.png> <./images/zin
c_00138607-mm-3ob-subplots-dihe-chi3.png>] [21 <./images/zinc_00164361-mm-3ob-s
ubplots-dihe-chi1.png> <./images/zinc_00167648-mm-3ob-subplots-dihe-chi1.png> <
./images/zinc_00167648-mm-3ob-subplots-dihe-chi2.png> <./images/zinc_00167648-m
m-3ob-subplots-dihe-chi3.png>] [22 <./images/zinc_01755198-mm-3ob-subplots-dihe
-chi1.png> <./images/zinc_01755198-mm-3ob-subplots-dihe-chi2.png> <./images/zin
c_01755198-mm-3ob-subplots-dihe-chi3.png> <./images/zinc_01755198-mm-3ob-subplo
ts-dihe-chi4.png> <./images/zinc_01755198-mm-3ob-subplots-dihe-chi5.png>]
[23 <./images/zinc_01867000-mm-3ob-subplots-dihe-chi1.png> <./images/zinc_01867
000-mm-3ob-subplots-dihe-chi2.png>] [24 <./images/zinc_03127671-mm-3ob-subplots
-dihe-chi1.png> <./images/zinc_03127671-mm-3ob-subplots-dihe-chi2.png> <./image
s/zinc_03127671-mm-3ob-subplots-dihe-chi3.png> <./images/zinc_03127671-mm-3ob-s
ubplots-dihe-chi4.png> <./images/zinc_03127671-mm-3ob-subplots-dihe-chi5.png> <
./images/zinc_03127671-mm-3ob-subplots-dihe-chi6.png> <./images/zinc_03127671-m
m-3ob-subplots-dihe-chi7.png> <./images/zinc_03127671-mm-3ob-subplots-dihe-chi8
.png> <./images/zinc_03127671-mm-3ob-subplots-dihe-chi9.png> <./images/zinc_031
27671-mm-3ob-subplots-dihe-chi10.png>] [25 <./images/zinc_04344392-mm-3ob-subpl
ots-dihe-chi1.png> <./images/zinc_04344392-mm-3ob-subplots-dihe-chi2.png> <./im
ages/zinc_04344392-mm-3ob-subplots-dihe-chi3.png> <./images/zinc_04344392-mm-3o
b-subplots-dihe-chi4.png> <./images/zinc_04344392-mm-3ob-subplots-dihe-chi5.png
> <./images/zinc_04344392-mm-3ob-subplots-dihe-chi6.png> <./images/zinc_0434439
2-mm-3ob-subplots-dihe-chi7.png> <./images/zinc_04344392-mm-3ob-subplots-dihe-c
hi8.png> <./images/zinc_04344392-mm-3ob-subplots-dihe-chi9.png> <./images/zinc_
04344392-mm-3ob-subplots-dihe-chi10.png>] [26 <./images/zinc_04363792-mm-3ob-su
bplots-dihe-chi1.png> <./images/zinc_04363792-mm-3ob-subplots-dihe-chi2.png> <.
/images/zinc_06568023-mm-3ob-subplots-dihe-chi1.png> <./images/zinc_06568023-mm
-3ob-subplots-dihe-chi2.png> <./images/zinc_06568023-mm-3ob-subplots-dihe-chi3.
png>] [27 <./images/zinc_33381936-mm-3ob-subplots-dihe-chi1.png> <./images/zinc
_33381936-mm-3ob-subplots-dihe-chi2.png> <./images/zinc_33381936-mm-3ob-subplot
s-dihe-chi3.png>] (./hipen22.aux) ) 
Here is how much of TeX's memory you used:
 17458 strings out of 492982
 347996 string characters out of 6134896
 437935 words of memory out of 5000000
 20537 multiletter control sequences out of 15000+600000
 14789 words of font info for 57 fonts, out of 8000000 for 9000
 1141 hyphenation exceptions out of 8191
 103i,8n,103p,506b,544s stack positions out of 5000i,500n,10000p,200000b,80000s
</usr/share/texlive/texmf-dist/fonts/type1/p
ublic/amsfonts/cm/cmbx10.pfb></usr/share/texlive/texmf-dist/fonts/type1/public/
amsfonts/cm/cmbx8.pfb></usr/share/texlive/texmf-dist/fonts/type1/public/amsfont
s/cm/cmmi10.pfb></usr/share/texlive/texmf-dist/fonts/type1/public/amsfonts/cm/c
mmi6.pfb></usr/share/texlive/texmf-dist/fonts/type1/public/amsfonts/cm/cmmi7.pf
b></usr/share/texlive/texmf-dist/fonts/type1/public/amsfonts/cm/cmmi8.pfb></usr
/share/texlive/texmf-dist/fonts/type1/public/amsfonts/cm/cmr10.pfb></usr/share/
texlive/texmf-dist/fonts/type1/public/amsfonts/cm/cmr12.pfb></usr/share/texlive
/texmf-dist/fonts/type1/public/amsfonts/cm/cmr6.pfb></usr/share/texlive/texmf-d
ist/fonts/type1/public/amsfonts/cm/cmr7.pfb></usr/share/texlive/texmf-dist/font
s/type1/public/amsfonts/cm/cmr8.pfb></usr/share/texlive/texmf-dist/fonts/type1/
public/amsfonts/cm/cmss10.pfb></usr/share/texlive/texmf-dist/fonts/type1/public
/amsfonts/cm/cmss12.pfb></usr/share/texlive/texmf-dist/fonts/type1/public/amsfo
nts/cm/cmssbx10.pfb></usr/share/texlive/texmf-dist/fonts/type1/public/amsfonts/
cm/cmsy10.pfb></usr/share/texlive/texmf-dist/fonts/type1/public/amsfonts/cm/cms
y6.pfb></usr/share/texlive/texmf-dist/fonts/type1/public/amsfonts/cm/cmsy7.pfb>
</usr/share/texlive/texmf-dist/fonts/type1/public/amsfonts/cm/cmsy8.pfb></usr/s
hare/texlive/texmf-dist/fonts/type1/public/amsfonts/cm/cmti12.pfb></usr/share/t
exlive/texmf-dist/fonts/type1/public/amsfonts/cm/cmtt12.pfb>
Output written on hipen22.pdf (27 pages, 4207266 bytes).
PDF statistics:
 405 PDF objects out of 1000 (max. 8388607)
 125 compressed objects within 2 object streams
 0 named destinations out of 1000 (max. 500000)
 588 words of extra memory for PDF output out of 10000 (max. 10000000)
