# Supplementary material for: The Good, the Bad, and the Ugly: “HiPen”, a New Dataset for Validating (S)QM/MM Free Energy Simulations
Source: Molecules. 2019 Feb 14;24(4):681. doi: 10.3390/molecules24040681 (PMC6413162; doi:10.3390/molecules24040681)
Supplement: Supplementary file 1 [file molecules-24-00681-s001.zip › final-SI/hipen22.tex]

\documentclass[journal=jctcce,manuscript=article]{achemso}
\setkeys{acs}{articletitle=true}

%\usepackage[version=3]{mhchem} % Formula subscripts using \ce{}
\usepackage{lineno}
%\usepackage{mciteplus}
%\usepackage{rotating}
%\usepackage{amscd}
%\documentclass[english,letterpaper,12pt,cite]{article}
%\documentclass[twocolumn,letterpaper,9pt,cite]{article}
%\usepackage{graphicx}% Include figure files
%\usepackage{caption} 
%\usepackage{subcaption}
%\usepackage{wrapfig}% Include figure files
\usepackage{dcolumn}
\usepackage{amsmath,amstext,amssymb}
\usepackage{natmove}
\usepackage{lscape}
%\usepackage[super,comma,sort&compress]{natbib}
%\usepackage{lipsum}
\usepackage{xspace}
\usepackage{rotating}
\usepackage{color}
\usepackage[usenames,dvipsnames]{xcolor}
\usepackage{tikz}
\usetikzlibrary{arrows.meta,calc,matrix}
\usepackage{soul}
%\usepackage{ulem}
\usepackage{setspace}
\linespread{2.0}\normalsize
\usepackage[font=footnotesize,labelfont=bf]{caption}
\usepackage[font=scriptsize,labelfont=bf]{subcaption}
\usepackage{adjustbox}
%\usepackage{subfigure}
%\usepackage{graphicx}
\extrafloats{100}
%\usepackage[dvips,a4paper,top=2.5cm,left=3cm,bottom=2.5cm,right=2.5cm,nohead]{geometry}
%\usepackage[dvips,letterpaper,top=1in,left=1in,bottom=1in,right=1in,nohead]{geometry}
% \color{blue}

\author{Fiona L. Kearns}
\email{fionakearns@mail.usf.edu}
\affiliation{Department of Chemistry, University of South Florida, 4202 E. Fowler Ave., CHE205, Tampa, FL 33620-5250, United States}
\author{Luke Warrensford}
\email{lwarrensford@mail.usf.edu}
\affiliation{Department of Chemistry, University of South Florida, 4202 E. Fowler Ave., CHE205, Tampa, FL 33620-5250, United States}
\author{Stefan Boresch}
\email{stefan@mdy.univie.ac.at}
\affiliation{University of Vienna, Faculty of Chemistry, Department of Computational Biological Chemistry, Waehringerstrasse 17, A-1090, Vienna, Austria}
\author{H. Lee Woodcock}
\email{hlw@usf.edu}
\affiliation{Department of Chemistry, University of South Florida, 4202 E. Fowler Ave., CHE205, Tampa, FL 33620-5250, United States}

\title{Supporting Information for The Good, the Bad, and the Ugly: ``Hipen,'' a new dataset for validating indirect free energy simulations}
%\author{Fiona L. Kearns, Luke Warrensford, Stefan Boresch, H. Lee Woodcock}
%\address{%
%$^{1}$ \quad Department of Chemistry, University of South Florida, 4202 E. Fowler Avenue, Tampa, FL, 33620 \\
%$^{2}$ \quad University of Vienna, Faculty of Chemistry, Department of Computational Biological Chemistry, Waehringerstrasse 17, A-1090, Vienna, Austria}
%\corres{Correspondence: hlw@usf.edu; Tel.: +1(813)974-9239}

\date{Today}

\begin{document}
\maketitle

This Supporting Information contains dihedral distribution plots and
potential energy overlap plots for all 22 molecules in the HiPen set.
Additionally, all topology, minimized coordinates, parameters, and
necessary input files can be found at
\url{https://zenodo.org/record/2328952}, doi:10.5281/zenodo.2328952.

\clearpage

\begin{figure}
%\centering
\includegraphics[width=0.75\textwidth]{./images/hipen22-chemdraw-11x14-300dpi.png}
\caption{All 22 molecules included in our HiPen testset.}
\end{figure}

\begin{figure}
\centering  
\begin{subfigure}[b]{0.45\textwidth}
\includegraphics[width=1.00\textwidth]{./images/zinc_00061095-mm-3ob-fep-overlap.png}
\caption{$P_{mm} = p(U^{3ob} - U^{MM})$, $P_{3ob} = -p(U^{MM} - U^{3ob})$}
\end{subfigure}
\begin{subfigure}[b]{0.45\textwidth}
\includegraphics[width=1.00\linewidth]{./images/zinc_00061095-mm-3ob-jar-overlap.png}
\caption{$P_{mm} = p(W^{MM \to 3ob})$, $P_{3ob} = -p(W^{3ob \to MM})$}
\end{subfigure}
\caption{(a) \textbf{1}'s potential energy ``forward'' ($P_{mm}$) and ``backward''
($P_{3ob}$) distributions plotted as ``offset'' from the $\overline{\Delta
U^{MM \to 3ob}}$ to simplify the x-axis. (b) \textbf{1}'s nonequilibrium work ``forward''
($P_{mm}$) and ``backward'' ($P_{3ob}$) distributions plotted as ``offset''
from the $\overline{W^{MM \to 3ob}}$ to simplify the x-axis.}
\end{figure}

\begin{figure}
\centering  
\begin{subfigure}[b]{0.45\textwidth}
\includegraphics[width=1.00\textwidth]{./images/zinc_00077329-mm-3ob-fep-overlap.png}
\caption{$P_{mm} = p(U^{3ob} - U^{MM})$, $P_{3ob} = -p(U^{MM} - U^{3ob})$}
\end{subfigure}
\begin{subfigure}[b]{0.45\textwidth}
\includegraphics[width=1.00\linewidth]{./images/zinc_00077329-mm-3ob-jar-overlap.png}
\caption{$P_{mm} = p(W^{MM \to 3ob})$, $P_{3ob} = -p(W^{3ob \to MM})$}
\end{subfigure}
\caption{(a) \textbf{2}'s potential energy ``forward'' ($P_{mm}$) and ``backward''
($P_{3ob}$) distributions plotted as ``offset'' from the $\overline{\Delta
U^{MM \to 3ob}}$ to simplify the x-axis. (b) \textbf{2}'s nonequilibrium work ``forward''
($P_{mm}$) and ``backward'' ($P_{3ob}$) distributions plotted as ``offset''
from the $\overline{W^{MM \to 3ob}}$ to simplify the x-axis.}
\end{figure}

\begin{figure} 
\centering
\begin{subfigure}[b]{0.45\textwidth}
\includegraphics[width=1.00\textwidth]{./images/zinc_00079729-mm-3ob-fep-overlap.png}
\caption{$P_{mm} = p(U^{3ob} - U^{MM})$, $P_{3ob} = -p(U^{MM} - U^{3ob})$}
\end{subfigure}
\begin{subfigure}[b]{0.45\textwidth}
\includegraphics[width=1.00\linewidth]{./images/zinc_00079729-mm-3ob-jar-overlap.png}
\caption{$P_{mm} = p(W^{MM \to 3ob})$, $P_{3ob} = -p(W^{3ob \to MM})$}
\end{subfigure}
\caption{(a) \textbf{3}'s potential energy ``forward'' ($P_{mm}$) and ``backward''
($P_{3ob}$) distributions plotted as ``offset'' from the $\overline{\Delta
U^{MM \to 3ob}}$ to simplify the x-axis. (b) \textbf{3}'s nonequilibrium work ``forward''
($P_{mm}$) and ``backward'' ($P_{3ob}$) distributions plotted as ``offset''
from the $\overline{W^{MM \to 3ob}}$ to simplify the x-axis.}
\end{figure}

\begin{figure} 
\centering
\begin{subfigure}[b]{0.45\textwidth}
\includegraphics[width=1.00\textwidth]{./images/zinc_00086442-mm-3ob-fep-overlap.png}
\caption{$P_{mm} = p(U^{3ob} - U^{MM})$, $P_{3ob} = -p(U^{MM} - U^{3ob})$}
\end{subfigure}
\begin{subfigure}[b]{0.45\textwidth}
\includegraphics[width=1.00\linewidth]{./images/zinc_00086442-mm-3ob-jar-overlap.png}
\caption{$P_{mm} = p(W^{MM \to 3ob})$, $P_{3ob} = -p(W^{3ob \to MM})$}
\end{subfigure}
\caption{(a) \textbf{4}'s potential energy ``forward'' ($P_{mm}$) and ``backward''
($P_{3ob}$) distributions plotted as ``offset'' from the $\overline{\Delta
U^{MM \to 3ob}}$ to simplify the x-axis. (b) \textbf{4}'s nonequilibrium work ``forward''
($P_{mm}$) and ``backward'' ($P_{3ob}$) distributions plotted as ``offset''
from the $\overline{W^{MM \to 3ob}}$ to simplify the x-axis.}
\end{figure}

\begin{figure} 
\centering
\begin{subfigure}[b]{0.45\textwidth}
\includegraphics[width=1.00\textwidth]{./images/zinc_00087557-mm-3ob-fep-overlap.png}
\caption{$P_{mm} = p(U^{3ob} - U^{MM})$, $P_{3ob} = -p(U^{MM} - U^{3ob})$}
\end{subfigure}
\begin{subfigure}[b]{0.45\textwidth}
\includegraphics[width=1.00\linewidth]{./images/zinc_00087557-mm-3ob-jar-overlap.png}
\caption{$P_{mm} = p(W^{MM \to 3ob})$, $P_{3ob} = -p(W^{3ob \to MM})$}
\end{subfigure}
\caption{(a) \textbf{5}'s potential energy ``forward'' ($P_{mm}$) and ``backward''
($P_{3ob}$) distributions plotted as ``offset'' from the $\overline{\Delta
U^{MM \to 3ob}}$ to simplify the x-axis. (b) \textbf{5}'s nonequilibrium work ``forward''
($P_{mm}$) and ``backward'' ($P_{3ob}$) distributions plotted as ``offset''
from the $\overline{W^{MM \to 3ob}}$ to simplify the x-axis.}
\end{figure}

\begin{figure} 
\centering
\begin{subfigure}[b]{0.45\textwidth}
\includegraphics[width=1.00\textwidth]{./images/zinc_00095858-mm-3ob-fep-overlap.png}
\caption{$P_{mm} = p(U^{3ob} - U^{MM})$, $P_{3ob} = -p(U^{MM} - U^{3ob})$}
\end{subfigure}
\begin{subfigure}[b]{0.45\textwidth}
\includegraphics[width=1.00\linewidth]{./images/zinc_00095858-mm-3ob-jar-overlap.png}
\caption{$P_{mm} = p(W^{MM \to 3ob})$, $P_{3ob} = -p(W^{3ob \to MM})$}
\end{subfigure}
\caption{(a) \textbf{6}'s potential energy ``forward'' ($P_{mm}$) and ``backward''
($P_{3ob}$) distributions plotted as ``offset'' from the $\overline{\Delta
U^{MM \to 3ob}}$ to simplify the x-axis. (b) \textbf{6}'s nonequilibrium work ``forward''
($P_{mm}$) and ``backward'' ($P_{3ob}$) distributions plotted as ``offset''
from the $\overline{W^{MM \to 3ob}}$ to simplify the x-axis.}
\end{figure}

\begin{figure} 
\centering
\begin{subfigure}[b]{0.45\textwidth}
\includegraphics[width=1.00\textwidth]{./images/zinc_00107550-mm-3ob-fep-overlap.png}
\caption{$P_{mm} = p(U^{3ob} - U^{MM})$, $P_{3ob} = -p(U^{MM} - U^{3ob})$}
\end{subfigure}
\begin{subfigure}[b]{0.45\textwidth}
\includegraphics[width=1.00\linewidth]{./images/zinc_00107550-mm-3ob-jar-overlap.png}
\caption{$P_{mm} = p(W^{MM \to 3ob})$, $P_{3ob} = -p(W^{3ob \to MM})$}
\end{subfigure}
\caption{(a) \textbf{7}'s potential energy ``forward'' ($P_{mm}$) and ``backward''
($P_{3ob}$) distributions plotted as ``offset'' from the $\overline{\Delta
U^{MM \to 3ob}}$ to simplify the x-axis. (b) \textbf{7}'s nonequilibrium work ``forward''
($P_{mm}$) and ``backward'' ($P_{3ob}$) distributions plotted as ``offset''
from the $\overline{W^{MM \to 3ob}}$ to simplify the x-axis.}
\end{figure}

\begin{figure} 
\centering
\begin{subfigure}[b]{0.45\textwidth}
\includegraphics[width=1.00\textwidth]{./images/zinc_00107778-mm-3ob-fep-overlap.png}
\caption{$P_{mm} = p(U^{3ob} - U^{MM})$, $P_{3ob} = -p(U^{MM} - U^{3ob})$}
\end{subfigure}
\begin{subfigure}[b]{0.45\textwidth}
\includegraphics[width=1.00\linewidth]{./images/zinc_00107778-mm-3ob-jar-overlap.png}
\caption{$P_{mm} = p(W^{MM \to 3ob})$, $P_{3ob} = -p(W^{3ob \to MM})$}
\end{subfigure}
\caption{(a) \textbf{8}'s potential energy ``forward'' ($P_{mm}$) and ``backward''
($P_{3ob}$) distributions plotted as ``offset'' from the $\overline{\Delta
U^{MM \to 3ob}}$ to simplify the x-axis. (b) \textbf{8}'s nonequilibrium work ``forward''
($P_{mm}$) and ``backward'' ($P_{3ob}$) distributions plotted as ``offset''
from the $\overline{W^{MM \to 3ob}}$ to simplify the x-axis.}
\end{figure}

\begin{figure} 
\centering
\begin{subfigure}[b]{0.45\textwidth}
\includegraphics[width=1.00\textwidth]{./images/zinc_00123162-mm-3ob-fep-overlap.png}
\caption{$P_{mm} = p(U^{3ob} - U^{MM})$, $P_{3ob} = -p(U^{MM} - U^{3ob})$}
\end{subfigure}
\begin{subfigure}[b]{0.45\textwidth}
\includegraphics[width=1.00\linewidth]{./images/zinc_00123162-mm-3ob-jar-overlap.png}
\caption{$P_{mm} = p(W^{MM \to 3ob})$, $P_{3ob} = -p(W^{3ob \to MM})$}
\end{subfigure}
\caption{(a) \textbf{9}'s potential energy ``forward'' ($P_{mm}$) and ``backward''
($P_{3ob}$) distributions plotted as ``offset'' from the $\overline{\Delta
U^{MM \to 3ob}}$ to simplify the x-axis. (b) \textbf{9}'s nonequilibrium work ``forward''
($P_{mm}$) and ``backward'' ($P_{3ob}$) distributions plotted as ``offset''
from the $\overline{W^{MM \to 3ob}}$ to simplify the x-axis.}
\end{figure}

\begin{figure} 
\centering
\begin{subfigure}[b]{0.45\textwidth}
\includegraphics[width=1.00\textwidth]{./images/zinc_00133435-mm-3ob-fep-overlap.png}
\caption{$P_{mm} = p(U^{3ob} - U^{MM})$, $P_{3ob} = -p(U^{MM} - U^{3ob})$}
\end{subfigure}
\begin{subfigure}[b]{0.45\textwidth}
\includegraphics[width=1.00\linewidth]{./images/zinc_00133435-mm-3ob-jar-overlap.png}
\caption{$P_{mm} = p(W^{MM \to 3ob})$, $P_{3ob} = -p(W^{3ob \to MM})$}
\end{subfigure}
\caption{(a) \textbf{10}'s potential energy ``forward'' ($P_{mm}$) and ``backward''
($P_{3ob}$) distributions plotted as ``offset'' from the $\overline{\Delta
U^{MM \to 3ob}}$ to simplify the x-axis. (b) \textbf{10}'s nonequilibrium work ``forward''
($P_{mm}$) and ``backward'' ($P_{3ob}$) distributions plotted as ``offset''
from the $\overline{W^{MM \to 3ob}}$ to simplify the x-axis.}
\end{figure}

\begin{figure} 
\centering
\begin{subfigure}[b]{0.45\textwidth}
\includegraphics[width=1.00\textwidth]{./images/zinc_00138607-mm-3ob-fep-overlap.png}
\caption{$P_{mm} = p(U^{3ob} - U^{MM})$, $P_{3ob} = -p(U^{MM} - U^{3ob})$}
\end{subfigure}
\begin{subfigure}[b]{0.45\textwidth}
\includegraphics[width=1.00\linewidth]{./images/zinc_00138607-mm-3ob-jar-overlap.png}
\caption{$P_{mm} = p(W^{MM \to 3ob})$, $P_{3ob} = -p(W^{3ob \to MM})$}
\end{subfigure}
\caption{(a) \textbf{11}'s potential energy ``forward'' ($P_{mm}$) and ``backward''
($P_{3ob}$) distributions plotted as ``offset'' from the $\overline{\Delta
U^{MM \to 3ob}}$ to simplify the x-axis. (b) \textbf{11}'s nonequilibrium work ``forward''
($P_{mm}$) and ``backward'' ($P_{3ob}$) distributions plotted as ``offset''
from the $\overline{W^{MM \to 3ob}}$ to simplify the x-axis.}
\end{figure}

\begin{figure} 
\centering
\begin{subfigure}[b]{0.45\textwidth}
\includegraphics[width=1.00\textwidth]{./images/zinc_00140610-mm-3ob-fep-overlap.png}
\caption{$P_{mm} = p(U^{3ob} - U^{MM})$, $P_{3ob} = -p(U^{MM} - U^{3ob})$}
\end{subfigure}
\begin{subfigure}[b]{0.45\textwidth}
\includegraphics[width=1.00\linewidth]{./images/zinc_00140610-mm-3ob-jar-overlap.png}
\caption{$P_{mm} = p(W^{MM \to 3ob})$, $P_{3ob} = -p(W^{3ob \to MM})$}
\end{subfigure}
\caption{(a) \textbf{12}'s potential energy ``forward'' ($P_{mm}$) and ``backward''
($P_{3ob}$) distributions plotted as ``offset'' from the $\overline{\Delta
U^{MM \to 3ob}}$ to simplify the x-axis. (b) \textbf{12}'s nonequilibrium work ``forward''
($P_{mm}$) and ``backward'' ($P_{3ob}$) distributions plotted as ``offset''
from the $\overline{W^{MM \to 3ob}}$ to simplify the x-axis.}
\end{figure}

\begin{figure} 
\centering
\begin{subfigure}[b]{0.45\textwidth}
\includegraphics[width=1.00\textwidth]{./images/zinc_00164361-mm-3ob-fep-overlap.png}
\caption{$P_{mm} = p(U^{3ob} - U^{MM})$, $P_{3ob} = -p(U^{MM} - U^{3ob})$}
\end{subfigure}
\begin{subfigure}[b]{0.45\textwidth}
\includegraphics[width=1.00\linewidth]{./images/zinc_00164361-mm-3ob-jar-overlap.png}
\caption{$P_{mm} = p(W^{MM \to 3ob})$, $P_{3ob} = -p(W^{3ob \to MM})$}
\end{subfigure}
\caption{(a) \textbf{13}'s potential energy ``forward'' ($P_{mm}$) and ``backward''
($P_{3ob}$) distributions plotted as ``offset'' from the $\overline{\Delta
U^{MM \to 3ob}}$ to simplify the x-axis. (b) \textbf{13}'s nonequilibrium work ``forward''
($P_{mm}$) and ``backward'' ($P_{3ob}$) distributions plotted as ``offset''
from the $\overline{W^{MM \to 3ob}}$ to simplify the x-axis.}
\end{figure}

\begin{figure} 
\centering
\begin{subfigure}[b]{0.45\textwidth}
\includegraphics[width=1.00\textwidth]{./images/zinc_00167648-mm-3ob-fep-overlap.png}
\caption{$P_{mm} = p(U^{3ob} - U^{MM})$, $P_{3ob} = -p(U^{MM} - U^{3ob})$}
\end{subfigure}
\begin{subfigure}[b]{0.45\textwidth}
\includegraphics[width=1.00\linewidth]{./images/zinc_00167648-mm-3ob-jar-overlap.png}
\caption{$P_{mm} = p(W^{MM \to 3ob})$, $P_{3ob} = -p(W^{3ob \to MM})$}
\end{subfigure}
\caption{(a) \textbf{14}'s potential energy ``forward'' ($P_{mm}$) and ``backward''
($P_{3ob}$) distributions plotted as ``offset'' from the $\overline{\Delta
U^{MM \to 3ob}}$ to simplify the x-axis. (b) \textbf{14}'s nonequilibrium work ``forward''
($P_{mm}$) and ``backward'' ($P_{3ob}$) distributions plotted as ``offset''
from the $\overline{W^{MM \to 3ob}}$ to simplify the x-axis.}
\end{figure}

\begin{figure} 
\centering
\begin{subfigure}[b]{0.45\textwidth}
\includegraphics[width=1.00\textwidth]{./images/zinc_00169358-mm-3ob-fep-overlap.png}
\caption{$P_{mm} = p(U^{3ob} - U^{MM})$, $P_{3ob} = -p(U^{MM} - U^{3ob})$}
\end{subfigure}
\begin{subfigure}[b]{0.45\textwidth}
\includegraphics[width=1.00\linewidth]{./images/zinc_00169358-mm-3ob-jar-overlap.png}
\caption{$P_{mm} = p(W^{MM \to 3ob})$, $P_{3ob} = -p(W^{3ob \to MM})$}
\end{subfigure}
\caption{(a) \textbf{15}'s potential energy ``forward'' ($P_{mm}$) and ``backward''
($P_{3ob}$) distributions plotted as ``offset'' from the $\overline{\Delta
U^{MM \to 3ob}}$ to simplify the x-axis. (b) \textbf{15}'s nonequilibrium work ``forward''
($P_{mm}$) and ``backward'' ($P_{3ob}$) distributions plotted as ``offset''
from the $\overline{W^{MM \to 3ob}}$ to simplify the x-axis.}
\end{figure}


\begin{figure} 
\centering
\begin{subfigure}[b]{0.45\textwidth}
\includegraphics[width=1.00\textwidth]{./images/zinc_01755198-mm-3ob-fep-overlap.png}
\caption{$P_{mm} = p(U^{3ob} - U^{MM})$, $P_{3ob} = -p(U^{MM} - U^{3ob})$}
\end{subfigure}
\begin{subfigure}[b]{0.45\textwidth}
\includegraphics[width=1.00\linewidth]{./images/zinc_01755198-mm-3ob-jar-overlap.png}
\caption{$P_{mm} = p(W^{MM \to 3ob})$, $P_{3ob} = -p(W^{3ob \to MM})$}
\end{subfigure}
\caption{(a) \textbf{16}'s potential energy ``forward'' ($P_{mm}$) and ``backward''
($P_{3ob}$) distributions plotted as ``offset'' from the $\overline{\Delta
U^{MM \to 3ob}}$ to simplify the x-axis. (b) \textbf{16}'s nonequilibrium work ``forward''
($P_{mm}$) and ``backward'' ($P_{3ob}$) distributions plotted as ``offset''
from the $\overline{W^{MM \to 3ob}}$ to simplify the x-axis.}
\end{figure}

\begin{figure} 
\centering
\begin{subfigure}[b]{0.45\textwidth}
\includegraphics[width=1.00\textwidth]{./images/zinc_01867000-mm-3ob-fep-overlap.png}
\caption{$P_{mm} = p(U^{3ob} - U^{MM})$, $P_{3ob} = -p(U^{MM} - U^{3ob})$}
\end{subfigure}
\begin{subfigure}[b]{0.45\textwidth}
\includegraphics[width=1.00\linewidth]{./images/zinc_01867000-mm-3ob-jar-overlap.png}
\caption{$P_{mm} = p(W^{MM \to 3ob})$, $P_{3ob} = -p(W^{3ob \to MM})$}
\end{subfigure}
\caption{(a) \textbf{17}'s potential energy ``forward'' ($P_{mm}$) and ``backward''
($P_{3ob}$) distributions plotted as ``offset'' from the $\overline{\Delta
U^{MM \to 3ob}}$ to simplify the x-axis. (b) \textbf{17}'s nonequilibrium work ``forward''
($P_{mm}$) and ``backward'' ($P_{3ob}$) distributions plotted as ``offset''
from the $\overline{W^{MM \to 3ob}}$ to simplify the x-axis.}
\end{figure}

\begin{figure} 
\centering
\begin{subfigure}[b]{0.45\textwidth}
\includegraphics[width=1.00\textwidth]{./images/zinc_03127671-mm-3ob-fep-overlap.png}
\caption{$P_{mm} = p(U^{3ob} - U^{MM})$, $P_{3ob} = -p(U^{MM} - U^{3ob})$}
\end{subfigure}
\begin{subfigure}[b]{0.45\textwidth}
\includegraphics[width=1.00\linewidth]{./images/zinc_03127671-mm-3ob-jar-overlap.png}
\caption{$P_{mm} = p(W^{MM \to 3ob})$, $P_{3ob} = -p(W^{3ob \to MM})$}
\end{subfigure}
\caption{(a) \textbf{18}'s potential energy ``forward'' ($P_{mm}$) and ``backward''
($P_{3ob}$) distributions plotted as ``offset'' from the $\overline{\Delta
U^{MM \to 3ob}}$ to simplify the x-axis. (b) \textbf{18}'s nonequilibrium work ``forward''
($P_{mm}$) and ``backward'' ($P_{3ob}$) distributions plotted as ``offset''
from the $\overline{W^{MM \to 3ob}}$ to simplify the x-axis.}
\end{figure}

\begin{figure} 
\centering
\begin{subfigure}[b]{0.45\textwidth}
\includegraphics[width=1.00\textwidth]{./images/zinc_04344392-mm-3ob-fep-overlap.png}
\caption{$P_{mm} = p(U^{3ob} - U^{MM})$, $P_{3ob} = -p(U^{MM} - U^{3ob})$}
\end{subfigure}
\begin{subfigure}[b]{0.45\textwidth}
\includegraphics[width=1.00\linewidth]{./images/zinc_04344392-mm-3ob-jar-overlap.png}
\caption{$P_{mm} = p(W^{MM \to 3ob})$, $P_{3ob} = -p(W^{3ob \to MM})$}
\end{subfigure}
\caption{(a) \textbf{19}'s potential energy ``forward'' ($P_{mm}$) and ``backward''
($P_{3ob}$) distributions plotted as ``offset'' from the $\overline{\Delta
U^{MM \to 3ob}}$ to simplify the x-axis. (b) \textbf{19}'s nonequilibrium work ``forward''
($P_{mm}$) and ``backward'' ($P_{3ob}$) distributions plotted as ``offset''
from the $\overline{W^{MM \to 3ob}}$ to simplify the x-axis.}
\end{figure}

\begin{figure} 
\centering
\begin{subfigure}[b]{0.45\textwidth}
\includegraphics[width=1.00\textwidth]{./images/zinc_04363792-mm-3ob-fep-overlap.png}
\caption{$P_{mm} = p(U^{3ob} - U^{MM})$, $P_{3ob} = -p(U^{MM} - U^{3ob})$}
\end{subfigure}
\begin{subfigure}[b]{0.45\textwidth}
\includegraphics[width=1.00\linewidth]{./images/zinc_04363792-mm-3ob-jar-overlap.png}
\caption{$P_{mm} = p(W^{MM \to 3ob})$, $P_{3ob} = -p(W^{3ob \to MM})$}
\end{subfigure}
\caption{(a) \textbf{20}'s potential energy ``forward'' ($P_{mm}$) and ``backward''
($P_{3ob}$) distributions plotted as ``offset'' from the $\overline{\Delta
U^{MM \to 3ob}}$ to simplify the x-axis. (b) \textbf{20}'s nonequilibrium work ``forward''
($P_{mm}$) and ``backward'' ($P_{3ob}$) distributions plotted as ``offset''
from the $\overline{W^{MM \to 3ob}}$ to simplify the x-axis.}
\end{figure}

\begin{figure} 
\centering
\begin{subfigure}[b]{0.45\textwidth}
\includegraphics[width=1.00\textwidth]{./images/zinc_06568023-mm-3ob-fep-overlap.png}
\caption{$P_{mm} = p(U^{3ob} - U^{MM})$, $P_{3ob} = -p(U^{MM} - U^{3ob})$}
\end{subfigure}
\begin{subfigure}[b]{0.45\textwidth}
\includegraphics[width=1.00\linewidth]{./images/zinc_06568023-mm-3ob-jar-overlap.png}
\caption{$P_{mm} = p(W^{MM \to 3ob})$, $P_{3ob} = -p(W^{3ob \to MM})$}
\end{subfigure}
\caption{(a) \textbf{21}'s potential energy ``forward'' ($P_{mm}$) and ``backward''
($P_{3ob}$) distributions plotted as ``offset'' from the $\overline{\Delta
U^{MM \to 3ob}}$ to simplify the x-axis. (b) \textbf{21}'s nonequilibrium work ``forward''
($P_{mm}$) and ``backward'' ($P_{3ob}$) distributions plotted as ``offset''
from the $\overline{W^{MM \to 3ob}}$ to simplify the x-axis.}
\end{figure}

\begin{figure} 
\centering
\begin{subfigure}[b]{0.45\textwidth}
\includegraphics[width=1.00\textwidth]{./images/zinc_33381936-mm-3ob-fep-overlap.png}
\caption{$P_{mm} = p(U^{3ob} - U^{MM})$, $P_{3ob} = -p(U^{MM} - U^{3ob})$}
\end{subfigure}
\begin{subfigure}[b]{0.45\textwidth}
\includegraphics[width=1.00\linewidth]{./images/zinc_33381936-mm-3ob-jar-overlap.png}
\caption{$P_{mm} = p(W^{MM \to 3ob})$, $P_{3ob} = -p(W^{3ob \to MM})$}
\end{subfigure}
\caption{(a) \textbf{22}'s potential energy ``forward'' ($P_{mm}$) and ``backward''
($P_{3ob}$) distributions plotted as ``offset'' from the $\overline{\Delta
U^{MM \to 3ob}}$ to simplify the x-axis. (b) \textbf{22}'s nonequilibrium work ``forward''
($P_{mm}$) and ``backward'' ($P_{3ob}$) distributions plotted as ``offset''
from the $\overline{W^{MM \to 3ob}}$ to simplify the x-axis.}
\end{figure}


\begin{figure}
\centering
\begin{subfigure}[b]{0.45\textwidth}
\includegraphics[width=1.00\textwidth]{./images/zinc_00061095-mm-3ob-subplots-dihe-chi1.png}
\caption{$\chi_1$}
\end{subfigure}
\begin{subfigure}[b]{0.45\textwidth}
\includegraphics[width=1.00\linewidth]{./images/zinc_00061095-mm-3ob-subplots-dihe-chi2.png}
\caption{$\chi_2$}
\end{subfigure}
\begin{subfigure}[b]{0.45\textwidth}
\includegraphics[width=1.00\linewidth]{./images/zinc_00061095-mm-3ob-subplots-dihe-chi3.png}
\caption{$\chi_3$}
\end{subfigure}
\begin{subfigure}[b]{0.45\textwidth}
\includegraphics[width=1.00\linewidth]{./images/zinc_00061095-mm-3ob-subplots-dihe-chi4.png}
\caption{$\chi_4$}
\end{subfigure}
\caption{Dihedral distributions of molecule \textbf{1}.}
\end{figure}


\begin{figure}
\centering
\begin{subfigure}[b]{0.45\textwidth}
\includegraphics[width=1.00\textwidth]{./images/zinc_00077329-mm-3ob-subplots-dihe-chi1.png}
\caption{$\chi_1$}
\end{subfigure}
\caption{Dihedral distributions of molecule \textbf{2}.}
\end{figure}


\begin{figure}
\centering
\begin{subfigure}[b]{0.45\textwidth}
\includegraphics[width=1.00\textwidth]{./images/zinc_00079729-mm-3ob-subplots-dihe-chi1.png}
\caption{$\chi_1$}
\end{subfigure}
\caption{Dihedral distributions of molecule \textbf{3}.}
\end{figure}


\begin{figure}
\centering
\begin{subfigure}[b]{0.45\textwidth}
\includegraphics[width=1.00\textwidth]{./images/zinc_00087557-mm-3ob-subplots-dihe-chi1.png}
\caption{$\chi_1$}
\end{subfigure}
\begin{subfigure}[b]{0.45\textwidth}
\includegraphics[width=1.00\linewidth]{./images/zinc_00087557-mm-3ob-subplots-dihe-chi2.png}
\caption{$\chi_2$}
\end{subfigure}
\begin{subfigure}[b]{0.45\textwidth}
\includegraphics[width=1.00\linewidth]{./images/zinc_00087557-mm-3ob-subplots-dihe-chi3.png}
\caption{$\chi_3$}
\end{subfigure}
\begin{subfigure}[b]{0.45\textwidth}
\includegraphics[width=1.00\linewidth]{./images/zinc_00087557-mm-3ob-subplots-dihe-chi4.png}
\caption{$\chi_4$}
\end{subfigure}
\begin{subfigure}[b]{0.45\textwidth}
\includegraphics[width=1.00\linewidth]{./images/zinc_00087557-mm-3ob-subplots-dihe-chi5.png}
\caption{$\chi_5$}
\end{subfigure}
\caption{Dihedral distributions of molecule \textbf{5}.}
\end{figure}


\begin{figure}
\centering
\begin{subfigure}[b]{0.45\textwidth}
\includegraphics[width=1.00\textwidth]{./images/zinc_00095858-mm-3ob-subplots-dihe-chi1.png}
\caption{$\chi_1$}
\end{subfigure}
\begin{subfigure}[b]{0.45\textwidth}
\includegraphics[width=1.00\linewidth]{./images/zinc_00095858-mm-3ob-subplots-dihe-chi2.png}
\caption{$\chi_2$}
\end{subfigure}
\begin{subfigure}[b]{0.45\textwidth}
\includegraphics[width=1.00\linewidth]{./images/zinc_00095858-mm-3ob-subplots-dihe-chi3.png}
\caption{$\chi_3$}
\end{subfigure}
\begin{subfigure}[b]{0.45\textwidth}
\includegraphics[width=1.00\linewidth]{./images/zinc_00095858-mm-3ob-subplots-dihe-chi4.png}
\caption{$\chi_4$}
\end{subfigure}
\caption{Dihedral distributions of molecule \textbf{6}.}
\end{figure}

\begin{figure}
\centering
\begin{subfigure}[b]{0.45\textwidth}
\includegraphics[width=1.00\textwidth]{./images/zinc_00107550-mm-3ob-subplots-dihe-chi1.png}
\caption{$\chi_1$}
\end{subfigure}
\begin{subfigure}[b]{0.45\textwidth}
\includegraphics[width=1.00\linewidth]{./images/zinc_00107550-mm-3ob-subplots-dihe-chi2.png}
\caption{$\chi_2$}
\end{subfigure}
\begin{subfigure}[b]{0.45\textwidth}
\includegraphics[width=1.00\linewidth]{./images/zinc_00107550-mm-3ob-subplots-dihe-chi3.png}
\caption{$\chi_3$}
\end{subfigure}
\caption{Dihedral distributions of molecule \textbf{7}.}
\end{figure}


\begin{figure}
\centering
\begin{subfigure}[b]{0.45\textwidth}
\includegraphics[width=1.00\textwidth]{./images/zinc_00107778-mm-3ob-subplots-dihe-chi1.png}
\caption{$\chi_1$}
\end{subfigure}
\begin{subfigure}[b]{0.45\textwidth}
\includegraphics[width=1.00\linewidth]{./images/zinc_00107778-mm-3ob-subplots-dihe-chi2.png}
\caption{$\chi_2$}
\end{subfigure}
\caption{Dihedral distributions of molecule \textbf{8}.}
\end{figure}

\begin{figure}
\centering
\begin{subfigure}[b]{0.45\textwidth}
\includegraphics[width=1.00\textwidth]{./images/zinc_00123162-mm-3ob-subplots-dihe-chi1.png}
\caption{$\chi_1$}
\end{subfigure}
\begin{subfigure}[b]{0.45\textwidth}
\includegraphics[width=1.00\linewidth]{./images/zinc_00123162-mm-3ob-subplots-dihe-chi2.png}
\caption{$\chi_2$}
\end{subfigure}
\begin{subfigure}[b]{0.45\textwidth}
\includegraphics[width=1.00\linewidth]{./images/zinc_00123162-mm-3ob-subplots-dihe-chi3.png}
\caption{$\chi_3$}
\end{subfigure}
\begin{subfigure}[b]{0.45\textwidth}
\includegraphics[width=1.00\linewidth]{./images/zinc_00123162-mm-3ob-subplots-dihe-chi4.png}
\caption{$\chi_4$}
\end{subfigure}
\begin{subfigure}[b]{0.45\textwidth}
\includegraphics[width=1.00\linewidth]{./images/zinc_00123162-mm-3ob-subplots-dihe-chi5.png}
\caption{$\chi_5$}
\end{subfigure}
\begin{subfigure}[b]{0.45\textwidth}
\includegraphics[width=1.00\linewidth]{./images/zinc_00123162-mm-3ob-subplots-dihe-chi6.png}
\caption{$\chi_6$}
\end{subfigure}
\caption{Dihedral distributions of molecule \textbf{9}.}
\end{figure}


\begin{figure}
\centering
\begin{subfigure}[b]{0.45\textwidth}
\includegraphics[width=1.00\textwidth]{./images/zinc_00133435-mm-3ob-subplots-dihe-chi1.png}
\caption{$\chi_1$}
\end{subfigure}
\begin{subfigure}[b]{0.45\textwidth}
\includegraphics[width=1.00\linewidth]{./images/zinc_00133435-mm-3ob-subplots-dihe-chi2.png}
\caption{$\chi_2$}
\end{subfigure}
\caption{Dihedral distributions of molecule \textbf{10}.}
\end{figure}


\begin{figure}
\centering
\begin{subfigure}[b]{0.45\textwidth}
\includegraphics[width=1.00\textwidth]{./images/zinc_00138607-mm-3ob-subplots-dihe-chi1.png}
\caption{$\chi_1$}
\end{subfigure}
\begin{subfigure}[b]{0.45\textwidth}
\includegraphics[width=1.00\linewidth]{./images/zinc_00138607-mm-3ob-subplots-dihe-chi2.png}
\caption{$\chi_2$}
\end{subfigure}
\begin{subfigure}[b]{0.45\textwidth}
\includegraphics[width=1.00\linewidth]{./images/zinc_00138607-mm-3ob-subplots-dihe-chi3.png}
\caption{$\chi_3$}
\end{subfigure}
\caption{Dihedral distributions of molecule \textbf{11}.}
\end{figure}

\begin{figure}
\centering
\begin{subfigure}[b]{0.45\textwidth}
\includegraphics[width=1.00\textwidth]{./images/zinc_00164361-mm-3ob-subplots-dihe-chi1.png}
\caption{$\chi_1$}
\end{subfigure}
\caption{Dihedral distributions of molecule \textbf{13}.}
\end{figure}

\begin{figure}
\centering
\begin{subfigure}[b]{0.45\textwidth}
\includegraphics[width=1.00\textwidth]{./images/zinc_00167648-mm-3ob-subplots-dihe-chi1.png}
\caption{$\chi_1$}
\end{subfigure}
\begin{subfigure}[b]{0.45\textwidth}
\includegraphics[width=1.00\linewidth]{./images/zinc_00167648-mm-3ob-subplots-dihe-chi2.png}
\caption{$\chi_2$}
\end{subfigure}
\begin{subfigure}[b]{0.45\textwidth}
\includegraphics[width=1.00\linewidth]{./images/zinc_00167648-mm-3ob-subplots-dihe-chi3.png}
\caption{$\chi_3$}
\end{subfigure}
\caption{Dihedral distributions of molecule \textbf{14}.}
\end{figure}

\begin{figure}
\centering
\begin{subfigure}[b]{0.45\textwidth}
\includegraphics[width=1.00\textwidth]{./images/zinc_01755198-mm-3ob-subplots-dihe-chi1.png}
\caption{$\chi_1$}
\end{subfigure}
\begin{subfigure}[b]{0.45\textwidth}
\includegraphics[width=1.00\linewidth]{./images/zinc_01755198-mm-3ob-subplots-dihe-chi2.png}
\caption{$\chi_2$}
\end{subfigure}
\begin{subfigure}[b]{0.45\textwidth}
\includegraphics[width=1.00\linewidth]{./images/zinc_01755198-mm-3ob-subplots-dihe-chi3.png}
\caption{$\chi_3$}
\end{subfigure}
\begin{subfigure}[b]{0.45\textwidth}
\includegraphics[width=1.00\linewidth]{./images/zinc_01755198-mm-3ob-subplots-dihe-chi4.png}
\caption{$\chi_4$}
\end{subfigure}
\begin{subfigure}[b]{0.45\textwidth}
\includegraphics[width=1.00\linewidth]{./images/zinc_01755198-mm-3ob-subplots-dihe-chi5.png}
\caption{$\chi_5$}
\end{subfigure}
\caption{Dihedral distributions of molecule \textbf{16}.}
\end{figure}

\begin{figure}
\centering
\begin{subfigure}[b]{0.45\textwidth}
\includegraphics[width=1.00\textwidth]{./images/zinc_01867000-mm-3ob-subplots-dihe-chi1.png}
\caption{$\chi_1$}
\end{subfigure}
\begin{subfigure}[b]{0.45\textwidth}
\includegraphics[width=1.00\linewidth]{./images/zinc_01867000-mm-3ob-subplots-dihe-chi2.png}
\caption{$\chi_2$}
\end{subfigure}
\caption{Dihedral distributions of molecule \textbf{17}.}
\end{figure}

\begin{figure}
\centering
\begin{subfigure}[b]{0.30\textwidth}
\includegraphics[width=1.00\textwidth]{./images/zinc_03127671-mm-3ob-subplots-dihe-chi1.png}
\caption{$\chi_1$}
\end{subfigure}
\begin{subfigure}[b]{0.30\textwidth}
\includegraphics[width=1.00\linewidth]{./images/zinc_03127671-mm-3ob-subplots-dihe-chi2.png}
\caption{$\chi_2$}
\end{subfigure}
\begin{subfigure}[b]{0.30\textwidth}
\includegraphics[width=1.00\linewidth]{./images/zinc_03127671-mm-3ob-subplots-dihe-chi3.png}
\caption{$\chi_3$}
\end{subfigure}
\begin{subfigure}[b]{0.30\textwidth}
\includegraphics[width=1.00\linewidth]{./images/zinc_03127671-mm-3ob-subplots-dihe-chi4.png}
\caption{$\chi_4$}
\end{subfigure}
\begin{subfigure}[b]{0.30\textwidth}
\includegraphics[width=1.00\linewidth]{./images/zinc_03127671-mm-3ob-subplots-dihe-chi5.png}
\caption{$\chi_5$}
\end{subfigure}
\begin{subfigure}[b]{0.30\textwidth}
\includegraphics[width=1.00\linewidth]{./images/zinc_03127671-mm-3ob-subplots-dihe-chi6.png}
\caption{$\chi_6$}
\end{subfigure}
\begin{subfigure}[b]{0.30\textwidth}
\includegraphics[width=1.00\linewidth]{./images/zinc_03127671-mm-3ob-subplots-dihe-chi7.png}
\caption{$\chi_7$}
\end{subfigure}
\begin{subfigure}[b]{0.30\textwidth}
\includegraphics[width=1.00\linewidth]{./images/zinc_03127671-mm-3ob-subplots-dihe-chi8.png}
\caption{$\chi_8$}
\end{subfigure}
\begin{subfigure}[b]{0.30\textwidth}
\includegraphics[width=1.00\linewidth]{./images/zinc_03127671-mm-3ob-subplots-dihe-chi9.png}
\caption{$\chi_9$}
\end{subfigure}
\begin{subfigure}[b]{0.30\textwidth}
\includegraphics[width=1.00\linewidth]{./images/zinc_03127671-mm-3ob-subplots-dihe-chi10.png}
\caption{$\chi_10$}
\end{subfigure}
\caption{Dihedral distributions of molecule \textbf{18}.}
\end{figure}

\begin{figure}
\centering
\begin{subfigure}[b]{0.30\textwidth}
\includegraphics[width=1.00\textwidth]{./images/zinc_04344392-mm-3ob-subplots-dihe-chi1.png}
\caption{$\chi_1$}
\end{subfigure}
\begin{subfigure}[b]{0.30\textwidth}
\includegraphics[width=1.00\linewidth]{./images/zinc_04344392-mm-3ob-subplots-dihe-chi2.png}
\caption{$\chi_2$}
\end{subfigure}
\begin{subfigure}[b]{0.30\textwidth}
\includegraphics[width=1.00\linewidth]{./images/zinc_04344392-mm-3ob-subplots-dihe-chi3.png}
\caption{$\chi_3$}
\end{subfigure}
\begin{subfigure}[b]{0.30\textwidth}
\includegraphics[width=1.00\linewidth]{./images/zinc_04344392-mm-3ob-subplots-dihe-chi4.png}
\caption{$\chi_4$}
\end{subfigure}
\begin{subfigure}[b]{0.30\textwidth}
\includegraphics[width=1.00\linewidth]{./images/zinc_04344392-mm-3ob-subplots-dihe-chi5.png}
\caption{$\chi_5$}
\end{subfigure}
\begin{subfigure}[b]{0.30\textwidth}
\includegraphics[width=1.00\linewidth]{./images/zinc_04344392-mm-3ob-subplots-dihe-chi6.png}
\caption{$\chi_6$}
\end{subfigure}
\begin{subfigure}[b]{0.30\textwidth}
\includegraphics[width=1.00\linewidth]{./images/zinc_04344392-mm-3ob-subplots-dihe-chi7.png}
\caption{$\chi_7$}
\end{subfigure}
\begin{subfigure}[b]{0.30\textwidth}
\includegraphics[width=1.00\linewidth]{./images/zinc_04344392-mm-3ob-subplots-dihe-chi8.png}
\caption{$\chi_8$}
\end{subfigure}
\begin{subfigure}[b]{0.30\textwidth}
\includegraphics[width=1.00\linewidth]{./images/zinc_04344392-mm-3ob-subplots-dihe-chi9.png}
\caption{$\chi_9$}
\end{subfigure}
\begin{subfigure}[b]{0.30\textwidth}
\includegraphics[width=1.00\linewidth]{./images/zinc_04344392-mm-3ob-subplots-dihe-chi10.png}
\caption{$\chi_10$}
\end{subfigure}
\caption{Dihedral distributions of molecule \textbf{19}.}
\end{figure}

\begin{figure}
\centering
\begin{subfigure}[b]{0.45\textwidth}
\includegraphics[width=1.00\textwidth]{./images/zinc_04363792-mm-3ob-subplots-dihe-chi1.png}
\caption{$\chi_1$}
\end{subfigure}
\begin{subfigure}[b]{0.45\textwidth}
\includegraphics[width=1.00\linewidth]{./images/zinc_04363792-mm-3ob-subplots-dihe-chi2.png}
\caption{$\chi_2$}
\end{subfigure}
\caption{Dihedral distributions of molecule \textbf{20}.}
\end{figure}

\begin{figure}
\centering
\begin{subfigure}[b]{0.45\textwidth}
\includegraphics[width=1.00\textwidth]{./images/zinc_06568023-mm-3ob-subplots-dihe-chi1.png}
\caption{$\chi_1$}
\end{subfigure}
\begin{subfigure}[b]{0.45\textwidth}
\includegraphics[width=1.00\linewidth]{./images/zinc_06568023-mm-3ob-subplots-dihe-chi2.png}
\caption{$\chi_2$}
\end{subfigure}
\begin{subfigure}[b]{0.45\textwidth}
\includegraphics[width=1.00\linewidth]{./images/zinc_06568023-mm-3ob-subplots-dihe-chi3.png}
\caption{$\chi_3$}
\end{subfigure}
\caption{Dihedral distributions of molecule \textbf{21}.}
\end{figure}

\begin{figure}
\centering
\begin{subfigure}[b]{0.45\textwidth}
\includegraphics[width=1.00\textwidth]{./images/zinc_33381936-mm-3ob-subplots-dihe-chi1.png}
\caption{$\chi_1$}
\end{subfigure}
\begin{subfigure}[b]{0.45\textwidth}
\includegraphics[width=1.00\linewidth]{./images/zinc_33381936-mm-3ob-subplots-dihe-chi2.png}
\caption{$\chi_2$}
\end{subfigure}
\begin{subfigure}[b]{0.45\textwidth}
\includegraphics[width=1.00\linewidth]{./images/zinc_33381936-mm-3ob-subplots-dihe-chi3.png}
\caption{$\chi_3$}
\end{subfigure}
\caption{Dihedral distributions of molecule \textbf{22}.}
\end{figure}

\end{document}

\newpage
\begin{table}[]
\caption{Relative energies calculated from gas phase geometry optimizations from all 20 fructose receptor binding modes. Energies are listed in kcal$\cdot$mol$^{-1}$ relative to the lowest energy structure for that functional/basis-set pairs.\label{tab-offset}}
\small
\centering
\begin{tabular}{ c | c | cc | c}
\hline
	 & $N_{tot}/N_{Heavy}$ & \multicolumn{2}{| c |}{CGenFF Penalties} & Offset \\ 
	 & & Param & Charge & (kcal/mol) \\ 
	\hline
	1 & 36/21 & 432.1 & 200.991 & $\pm$29000 \\
	2 & 16/10 & 378.5 & 347.24 & $\pm$15000 \\
	3 & 18/13 & 683 & 207.719 & $\pm$17000 \\
	4 & 21/12 & 312.5 & 283.616 & $\pm$19000 \\
	5 & 31/17 & 378.5 & 347.312 & $\pm$25000 \\
	6 & 25/16 & 567.9 & 361.399 & $\pm$25000 \\
	7 & 21/11 & 378.5 & 347.29 & $\pm$16000 \\
	8 & 22/15 & 378.5 & 347.29 & $\pm$21000 \\
	9 & 34/21 & 385.5  & 217.275 & $\pm$29000 \\
	10 & 34/22 & 470.5 & 27.135 & $\pm$28000 \\
	11 & 36/20 & 336 & 261.562 & $\pm$29000 \\
	12 & 20/12 & 449 & 214.896 & $\pm$17000 \\
	13 & 23/14 & 424 & 194.493  & $\pm$20000 \\
	14 & 44/26 & 436.5 & 226.598 & $\pm$35000 \\
	15 & 26/16 & 540.4 & 142.157 & $\pm$22000 \\
	16 & 37/22 & 528.5 & 74.547 & $\pm$30000 \\
	17 & 28/12 & 329  & 21.109  & $\pm$19000 \\
	18 & 32/18 & 470.5 & 5.818 & $\pm$22000 \\
	19 & 41/24 & 329 & 25.202 & $\pm$34000 \\
	20 & 52/29 & 329 & 24.783 & $\pm$40000 \\
	21 & 28/21 & 698 & 185.493 & $\pm$28000 \\
	22 & 30/18 & 329 & 21.597  & $\pm$25000 \\
	23 & 33/21 & 545.5 & 395.622 & $\pm$30000 \\
          \hline
\end{tabular}
\end{table}
\newpage


\newpage
\begin{landscape}
\begin{table}[ht]
\caption{Table showing equilibrium dA data.\label{tab-equil}}
\small
\centering
\begin{tabular}{ c | cccccc | cccccc | ccc | c | c }
\hline
	   & \multicolumn{6}{ | c |}{FEP(fw)}  & \multicolumn{6}{| c |}{FEP(bw)}  & \multicolumn{3}{| c |}{BAR}  & Overlap(\%)  & $\Pi$ (2 sided) \\ 
	\hline
	  & $\Delta A$ & Hyst & $\sigma_{\Delta A}$ & $\bar{\Delta U}$ & $\sigma_{\Delta U}$ & $\Pi$ &  $\Delta A$ & Hyst & $\sigma_{\Delta A}$ & $\bar{\Delta U}$ & $\sigma_{\Delta U}$ & $\Pi$ & $\Delta A$ & Hyst & $\sigma_{\Delta A}$ & $\Delta U$ & \\ 
	\hline
	1 & -301.11 & 4.08 & 5.29 & -282.47 & 7.89 & -3.14 & 305.82 & 1.87 & 2.02 & 322.87 & 7.30 & -3.29 & -303.34 & -0.15 & 3.18 & 0.05 & -3.58  \\
	2 & -255.52 & 0.19 & 0.51 & -245.10 & 4.29 & -1.15 & 258.88 & 0.29 & 0.60 & 268.72 & 5.28 & -1.47 & -256.87 & -0.046 & 0.11 & 0.29  & -1.54 \\
	3 & -413.45 & 1.09 & 1.00 & -402.47 & 3.49 & -1.17 & 416.27 & 0.46 & 0.82 & 428.26 & 4.86 & -2.07 & -413.99 &  -0.11 & 0.03 & 0.13  & -1.49 \\
	4 & -254.51 & 0.43 & 0.69 & -239.09 & 5.66 & -2.43 & 259.24 & 0.51 & 0.84 & 269.67 & 4.33 & -1.64 & -256.34 & 0.002 & 0.03 & 0.07  & -2.84 \\
	5 & -589.94 & 2.30 & 2.38 & -570.06 & 5.78 & -3.41 & 604.61 & 2.25 & 2.49 & 626.49 & 7.84 & -4.29 &  -596.97 & 0.48 &  0.25 & 0.00  & -4.74 \\
	6 & -109.58 & 2.58 & 2.59 & -86.31 & 7.14 & -4.07 & 130.57 & 4.83 & 4.41 & 162.27 & 10.42 & -6.04 &  -118.33 & 0.56 &  2.35 & 0.00 & -5.78   \\
	7 & -992.13 & 0.33 & 0.67 & -982.02 & 3.94 & -1.06 & 994.96 & 4.83 & 12.05 & 1011.88 & 19.05 & -3.26 & -993.15 & 0.21 & 0.27 & \textcolor{red}{0.00} & -1.35 \\
	8 & -994.00 & 4.16 & 4.03 & -982.45 & 4.39 & -1.46 & 988.29 & 9.09 & 5.74 & 1009.22 & 7.77 & -4.10 & -992.02 & 1.03 & 1.54 & 3.74 & -0.90   \\
	9 & -447.42 & 2.99 & 3.12 & -423.12 & 9.04 & -4.27 & 451.15 & 8.94 & 4.93  & 475.54 & 6.40 & -4.77 & -449.44 & 1.02 & 2.58 & 0.02 & -4.64  \\
	10 & -336.30 & 0.84 & 0.99 & -320.41 & 5.46 & -2.54 & 341.91 & 0.31 & 0.72 & 352.24 & 4.10 & -1.61 & -337.98 & 0.11 & 0.02 & 0.04 & -2.92 \\
	11 & -460.25 & 1.37 & 1.30 & -441.09 & 7.09 & -3.26 & 464.90 & 1.43 & 1.15 & 482.37 & 8.89 & -3.38 & -461.88 & 0.11 & 0.02 & 0.03 &  -3.59 \\
	12 & -70.74 & 2.17 & 1.31 & -54.33 & 4.82 & -2.66 & 84.97 & 0.85 & 1.21 &115.59 & 11.07 & -5.86 & -77.20 &  0.25 &  0.02 &  0.00 & -4.00 \\
	13 & -556.49 & 2.79 & 1.67 & -547.25 & 5.39 & -3.27 & 571.83 & 1.37 & 1.32 & 587.80 & 5.62 & -3.28 & -567.59 & 0.18 & 0.08 & 0.01 & -3.50  \\
	14 & -80.28 & 0.79 & 0.97 & -65.97 & 4.62 & -2.17 & 85.55 & 0.78 & 0.77 & 100.32 & 6.15 & -2.89 & -82.62 & 0.12 & 0.04 & 0.03 & -2.71   \\
	15 & -406.76 & 0.18 & 0.46 & -398.31 & 3.39 & -0.56 & 408.29 & 0.32 & 0.54 & 419.87 & 5.52 & -2.04 & -407.59 & 0.02 & 0.001 & 0.51 & -0.82   \\
	16 &  \textcolor{red}{MM} &  \textcolor{red}{MM} &  \textcolor{red}{MM} &  \textcolor{red}{MM} &  \textcolor{red}{MM} &  \textcolor{red}{MM} &  \textcolor{red}{454.47} &  \textcolor{red}{1.16} &  \textcolor{red}{2.06} &  \textcolor{red}{480.03} &  \textcolor{red}{10.17} &  \textcolor{red}{-4.99} &  \textcolor{red}{MM} &  \textcolor{red}{MM} &  \textcolor{red}{MM} &  \textcolor{red}{MM}   \\
	17 & -633.17 & 1.32 & 1.57 & -621.65 & 4.28 & -1.45 & 638.22 & 2.26 & 2.73 & 664.09 & 8.08 & -5.12 & -636.14 & 0.72 & 1.40 & 0.05 & -2.21   \\
	18 & -673.11 & 0.21 & 0.55 & -664.21 & 3.29 & -0.70 & 672.67 & -0.13 & 0.71 & 682.01 & 3.11 & -1.71 & -673.51 & -0.03 & 0.005 &  0.72 & -0.79  \\
	19 & -518.20 & 1.82 & 1.80 & -501.32 & 5.34 & -2.76 & 525.15 & 4.99 & 4.91 & 551.31 & 9.84 & -5.09 & -520.79 & 0.90 & 2.14 & 0.10 & -3.32   \\
	20 & -879.27 & 3.54 & 2.13 & -857.72 & 6.10 & 3.74 & 892.96 & 1.86 & 2.43 & 918.55 & 9.50 & -4.99 & -885.39 &  0.51 & 0.21 & 0.00  & -4.89 \\
	21 & -691.39 & 3.08 & 4.83 & -676.22 & 6.43 & -2.37 & 713.26 & 0.83 & 1.34 & 753.13 & 14.99 & -7.29 &  -702.33 &  0.83 &  1.13 & 0.00  & -4.60  \\
	22 & -70.62 & 2.52 & 1.58 & -59.20 & 3.66 & -1.43 & 69.86 & 1.10 & 1.30 & 87.37 & 8.66 & -3.39 & -69.33 & -0.25 & 0.05 & 0.37 & -1.07  \\
	23 & -177.51 & 0.73 & 0.97 & -165.15 & 4.25 & -1.68 & 181.81 & 0.816 & 1.04 & 213.38 & 37.01 & -6.02 & -179.19 & 0.14 & 0.004 & 0.07 & -2.10  \\
          \hline
\end{tabular}
\end{table}
\end{landscape}
\newpage

\newpage
\begin{landscape}
\begin{table}[ht]
\caption{Table showing nonequilibrium dA data. \label{tab-nonequil}}
\small
\centering
\begin{tabular}{ c | cccccc | cccccc | ccc | c | c}
\hline
	 & \multicolumn{6}{| c |}{JAR(fw} & \multicolumn{6}{| c |}{JAR(bw)} & \multicolumn{3}{| c |}{CRO} & Overlap(\%)  & $\Pi$ (2 sided) \\ 
	\hline
	 & $\Delta A$ & Hyst & $\sigma_{\Delta A}$ & $\bar{\Delta W}$ & $\sigma_{\Delta W}$ & $\Pi$ & $\Delta A$ & Hyst & $\sigma_{\Delta A}$ & $\bar{\Delta W}$ & $\sigma_{\Delta W}$ & $\Pi$ & $\Delta A$ & Hyst & $\sigma_{\Delta A}$ & $W$ & \\ 
	\hline
	1 & -305.97 & 2.92 & 3.87 & -299.85 & 5.07 & -0.80 & 300.95 & 0.47 & 0.39 & 302.15 & 1.97 & 1.60 & -301.61 & 0.53 & 0.31 & 33.29 & 1.30    \\
	2 & -272.53 & 0.21 & 0.48 & -271.48 & 0.60 & 1.86 & 271.88 & 0.13 & 0.48 & 272.59 & 1.59 & 2.19 & -271.84 & 0.09 & 0.05 & 54.55 & 2.63   \\
	3 & -408.69 & -0.001 & 0.03 & 408.18 & 0.90 & 2.40 & 408.63 & 0.002 & 0.05 & 409.03 & 0.64 & 2.57 & -408.64 & 0.004 & 0.00 & 57.62 & 2.46  \\
	4 & -271.25 & 0.001 & 0.03 & -271.10 & 0.41 & 3.02 & 271.15 & 0.00 & 0.02 & 271.31 & 0.49 & 3.00 & -271.20 & 0.003 & 0.00 & 81.03  & 3.16 \\
	5  & -539.16 & 0.58 & 0.98 & -535.17 & 1.98 & 0.08 & 537.50 & 2.26 & 2.71 & 543.25 & 3.18 & -0.66 & -538.78 & 0.36 & 0.28 & 8.98 & 0.25   \\
	6 & -143.51 & 3.69 & 2.10 & -137.78 & 2.08 & -0.65 & 138.57 & 1.46 & 2.12 & 143.83 & 3.12 & -0.47 & -140.17 & 0.41 & 0.07 & 24.17 &  0.90 \\
	7 & -999.40 & 0.42 & 0.69 & -998.41 & 0.69 & 1.91 & 998.80 & 1.37 & 2.82 & 1000.98 & 3.29 & 1.03 & -999.02 & 0.42 & 0.48 & 45.22 & 2.31  \\
	8  & -995.50 & 3.54 & 3.79 & -990.77 & 4.06 & -0.25 & 989.35 & 6.99 & 4.61 & 998.13 & 4.05 & -1.69 & -995.41 & 0.90 & 1.25 & 25.60 & -0.21   \\
	9  & -426.22 & 1.72 & 1.95 & -414.69 & 8.21 & -2.48 & 415.08 & 7.74 & 5.19 & 428.09 & 4.12 & -2.87 & -423.89 & 0.91 & 0.37 & 23.19 & -1.82   \\
	10 & -285.45 & 0.02 & 0.15 & -284.78 & 0.82 & 2.25 & 285.36 & 0.001 & 0.02 & 286.22 & 1.18 & 2.03 & -285.41 & 0.01 & 0.0001 & 46.98 & 2.29   \\
	11 & -510.05 & 0.02 & 0.17 & -506.81 & 2.93 & 0.99 &  509.50 &  0.23 &  0.41 & 510.72 & 0.96 & 1.68 & -509.92 & 0.03 & 0.004 &44.75 & 1.08 \\
	12 & -81.64 & 0.00 & 0.03 & -81.37 & 0.54 & 2.79 & 81.48 & 0.00 & 0.02 & 81.77 & 0.62 & 2.75 & -81.56 & 0.00 & 0.00 & 72.96   \\
	13 & -558.93 & 0.001 & 0.03 & -558.81 & 0.37 & 3.12 & 558.79 & -0.01 & 0.01 & 558.90 & 0.36 & 2.91 & -558.88 & 0.02 & 0.001 & 90.38   \\
	14 & -61.12 & -61.22 & 0.18 & -60.32 & 0.95 & 1.89 &  \textcolor{red}{MM} &  \textcolor{red}{MM} &  \textcolor{red}{MM} & 57.31 & 391.98 & 1.61 & -61.05 & -0.04 & 0.02 & 99.99   \\
	15 & -408.64 & 0.001 & 0.03 & -408.50 & 0.39 & 3.05 & 408.55 & 0.001 & 0.04 & 408.69  & 0.42 & 3.06 & -408.59 & -0.0002  & 0.0004 & 78.36   \\
	16 &  \textcolor{red}{MM} & \textcolor{red}{MM}  & \textcolor{red}{MM} & \textcolor{red}{MM}  & \textcolor{red}{MM} & \textcolor{red}{MM}  & \textcolor{red}{MM}  & \textcolor{red}{MM} & \textcolor{red}{MM} & \textcolor{red}{MM} & \textcolor{red}{MM}  & \textcolor{red}{MM} & \textcolor{red}{MM} & \textcolor{red}{MM} & \textcolor{red}{MM} &   \\
	17 & -605.09 & 2.62 & 2.69 & -600.49 & 2.53 & -0.19 & 599.77 & 2.54 & 0.82 & 607.38 & 4.70 &  -1.37 & -603.67 & 1.07 & 4.54 & 57.25   \\
	18 & -676.94 & 0.001 & 0.03 & -672.82 & 0.38 & 3.09 & 672.89 & 0.001 & 0.04 & 673.01 & 0.40 & 3.09 & -672.91 & 0.0006 & 0.0007 & 79.1   \\
	19 & -533.65 & 2.30 & 2.30 & -527.81 & 2.42 & -0.69 & 529.28 & 2.69 & 3.09 & 536.11 & 5.43 & -1.05 & -530.42 & -0.86 & 4.47 & 26.24  \\
	20 & -912.05 & 4.65 & 3.21 & -904.31 & 3.36 & -1.53 & 906.22 & 0.003 & 0.81 & 909.91 & 3.03 & 0.05 & -906.84 & -0.10 & 1.72 & 26.41   \\
	21 & -704.48 & 2.63 & 4.45 & -699.99 & 4.35 & -0.18 & 697.46 & 5.67 & 3.51 & 706.31 & 2.49 & -1.72 & -704.25 & 0.77 & 8.96 & 13.84 \\
	22 & -55.94 & 1.36 & 1.40 & -53.45 & 1.12 & 0.82 & 53.51 & -0.02 & 0.04 & 54.19 & 1.09 & 2.05 & -53.78 & -0.03 & 0.27 & 63.43  \\
	23 & -172.40 &  6.19 & 3.39 & -162.42 & 1.51 & -2.45 & 165.24 & 0.37 & 0.78 & 171.36 & 7.48 & -0.80 & -165.14 & 0.02 & 0.20 & 9.96   \\
          \hline
\end{tabular}
\end{table}
\end{landscape}
\newpage


\end{document}
